# Supplementary material for: Involvement of three putative glucosyltransferases from the UGT72 family in flavonol glucoside/rhamnoside biosynthesis in Lotus japonicus seeds
Source: PubMed Central journal article supplement (PMC5444469; doi:10.1093/jxb/erw420), 2016-11-18
Supplement: erw420_suppl_supplementary_tables_S1_S6_figures_S1_S9.pdf [file erw420_suppl_supplementary_tables_S1_S6_figures_S1_S9.pdf]

## Supplementary Data

**Table S1. List of *UGT* genes that were identified in the *L.japonicus* genome**

| Kazusa identifier     | Arabidopsis | Query  |                                                         | e value   | Score | Identity      | Positive      | Note        |
|-----------------------|-------------|--------|---------------------------------------------------------|-----------|-------|---------------|---------------|-------------|
|                       | ortholog    | length | Hit name                                                |           |       |               |               |             |
| chr1.CM0012.2360.r2.d | UGT73C5     | 311    | lcl UGT73C5 putative glucosyl transferase, chromosome 2 | 2.00E-125 | 366   | 163/288 (57%) | 227/288 (79%) | pseudo      |
| chr1.CM0012.2370.r2.a | UGT73C5     | 486    | lcl UGT73C5 putative glucosyl transferase, chromosome 2 | 0         | 589   | 271/487 (56%) | 362/487 (74%) | full-length |
| chr1.CM0088.150.r2.d  | UGT73B3     | 491    | lcl UGT73B3 AL021961, F28A23                            | 4.00E-173 | 494   | 256/488 (52%) | 334/488 (68%) | full-length |
| chr1.CM0105.690.r2.a  | UGT72B1     | 481    | lcl UGT72B1 AL161491, 75572-77014                       | 0         | 612   | 298/465 (64%) | 356/465 (77%) | full-length |
| chr1.CM0109.320.r2.m  | UGT73B3     | 471    | lcl UGT73B3 AL021961, F28A23                            | 6.00E-175 | 498   | 255/477 (53%) | 339/477 (71%) | full-length |
| chr1.CM0147.400.r2.m  | UGT74E1     | 129    | lcl UGT74E1 AC007153, F3F20, 82737-84239                | 2.00E-11  | 53.9  | 26/38 (68%)   | 29/38 (76%)   | pseudo      |
| chr1.CM0393.1010.r2.m | UGT74F2     | 212    | lcl UGT74F2 putative glucosyltransferase                | 5.00E-50  | 164   | 89/211 (42%)  | 124/211 (59%) | partial     |
| chr1.CM0393.1030.r2.m | UGT74E1     | 238    | lcl UGT74E1 AC007153, F3F20, 82737-84239                | 5.00E-87  | 262   | 127/233 (55%) | 165/233 (71%) | partial     |
| chr1.CM0393.1040.r2.m | UGT74F2     | 217    | lcl UGT74F2 putative glucosyltransferase                | 5.00E-48  | 159   | 87/210 (41%)  | 123/210 (59%) | partial     |
| chr1.CM0393.1090.r2.d | UGT74D1     | 268    | lcl UGT74D1 putative glucosyltransferase                | 5.00E-21  | 85.1  | 42/95 (44%)   | 59/95 (62%)   | pseudo      |
| chr1.CM0393.1100.r2.d | UGT74E1     | 156    | lcl UGT74E1 AC007153, F3F20, 82737-84239                | 4.00E-43  | 144   | 70/119 (59%)  | 88/119 (74%)  | partial     |
| chr1.CM0393.1120.r2.d | UGT74E2     | 465    | lcl UGT74E2 Similar to indole-3-acetate                 | 7.00E-132 | 387   | 205/458 (45%) | 286/458 (62%) | full-length |
| chr1.CM0393.1130.r2.d | UGT74E2     | 404    | lcl UGT74E2 Similar to indole-3-acetate                 | 5.00E-84  | 261   | 123/239 (51%) | 169/239 (71%) | pseudo      |
| chr1.CM0393.1250.r2.d | UGT74F2     | 181    | lcl UGT74F2 putative glucosyltransferase                | 4.00E-37  | 128   | 69/159 (43%)  | 97/159 (61%)  | partial     |
| chr1.CM0393.980.r2.m  | UGT74E2     | 457    | lcl UGT74E2 Similar to indole-3-acetate                 | 2.00E-127 | 375   | 203/457 (44%) | 276/457 (60%) | full-length |
| chr1.CM0393.990.r2.m  | UGT74C1     | 277    | lcl UGT74C1 putative glucosyltransferase                | 3.00E-46  | 157   | 71/129 (55%)  | 92/129 (71%)  | pseudo      |
| chr1.CM0410.100.r2.m  | UGT83A1     | 440    | lcl UGT83A1 similar to UDP-glucose glucosyltransferase  | 3.00E-114 | 341   | 186/463 (40%) | 277/463 (60%) | full-length |
| chr1.CM0410.110.r2.m  | UGT83A1     | 445    | lcl UGT83A1 similar to UDP-glucose glucosyltransferase  | 1.00E-130 | 383   | 195/460 (42%) | 282/460 (61%) | full-length |
| chr1.CM0410.130.r2.m  | UGT83A1     | 445    | lcl UGT83A1 similar to UDP-glucose glucosyltransferase  | 2.00E-123 | 364   | 187/460 (41%) | 277/460 (60%) | full-length |
| chr1.CM0410.140.r2.m  | UGT83A1     | 446    | lcl UGT83A1 similar to UDP-glucose glucosyltransferase  | 1.00E-119 | 355   | 192/462 (42%) | 281/462 (61%) | full-length |
| chr1.CM0410.150.r2.m  | UGT83A1     | 448    | lcl UGT83A1 similar to UDP-glucose glucosyltransferase  | 5.00E-133 | 389   | 199/461 (43%) | 289/461 (63%) | full-length |

|                        |          |     |                                                                          |           |      |               |               |             |
|------------------------|----------|-----|--------------------------------------------------------------------------|-----------|------|---------------|---------------|-------------|
| chr1.CM0591.560.r2.d   | UGT73B3  | 507 | lcl UGT73B3 AL021961,F28A23                                              | 4.00E-162 | 466  | 239/504 (47%) | 330/504 (65%) | full-length |
| chr1.CM0955.210.r2.d   | UGT81A3  | 36  | lcl UGT81A3 AJ000331, monogalactosyl diacylglycerol synthase             | 7.00E-09  | 43.1 | 17/23 (74%)   | 19/23 (83%)   | pseudo      |
| chr1.CM1413.240.r2.a   | UGT80A2  | 505 | lcl UGT80A2 Z83833, UDP-glucose:sterol glucosyltransferase               | 0         | 750  | 363/510 (71%) | 414/510 (81%) | partial     |
| chr1.CM1868.170.r2.m   | UGT89B1  | 211 | lcl UGT89B1 AC016662, F2P9, 86614-88035                                  | 2.00E-36  | 127  | 67/122 (55%)  | 87/122 (71%)  | pseudo      |
| chr1.CM1868.190.r2.m   | UGT89B1  | 480 | lcl UGT89B1 AC016662, F2P9, 86614-88035                                  | 1.00E-178 | 507  | 261/468 (56%) | 328/468 (70%) | full-length |
| chr1.LjT10H09.40.r2.m  | UGT72B1  | 482 | lcl UGT72B1 AL161491,75572-77014                                         | 6.00E-136 | 399  | 210/489 (43%) | 304/489 (62%) | full-length |
|                        |          |     | lcl UGT74B1 A. thaliana, Similar to glucosyltransferases,                |           |      |               |               |             |
| chr2.CM0028.830.r2.d   | UGT74B1  | 221 | (S-thiohydroximate-glucosyltransferase                                   | 6.00E-89  | 267  | 126/224 (56%) | 175/224 (78%) | partial     |
| chr2.CM0102.50.r2.d    | UGT82A1  | 78  | lcl UGT82A1 AP002046, MMP21, 6263-8510                                   | 2.00E-19  | 75.1 | 37/76 (49%)   | 50/76 (66%)   | partial     |
| chr2.CM0102.70.r2.d    | UGT82A1  | 405 | lcl UGT82A1 AP002046, MMP21, 6263-8510                                   | 8.00E-138 | 400  | 194/360 (54%) | 264/360 (73%) | partial     |
| chr2.CM0124.1460.r2.m  | UGT89A2  | 461 | lcl UGT89A2 AL162751, 85361-86758                                        | 3.00E-159 | 457  | 227/453 (50%) | 309/453 (68%) | full-length |
| chr2.CM0124.440.r2.m   | UGT85A2  | 481 | lcl UGT85A2 chromosome 1                                                 | 0         | 575  | 265/484 (55%) | 367/484 (76%) | full-length |
| chr2.CM0533.380.r2.a   | UGT88A1  | 457 | lcl UGT88A1 flavonol 3-O-glucosyltransferase-like protein                | 3.00E-55  | 186  | 114/344 (33%) | 180/344 (52%) | full-length |
| chr2.CM1882.140.r2.a   | UGT85A6P | 268 | lcl UGT85A6P AC068562, T16E15.4, 6537-8157                               | 2.00E-45  | 154  | 69/129 (53%)  | 93/129 (72%)  | pseudo      |
| chr2.CM1882.160.r2.a   | UGT85A2  | 630 | lcl UGT85A2 chromosome 1                                                 | 0         | 576  | 272/475 (57%) | 353/475 (74%) | partial     |
| chr2.CM1882.260.r2.a   | UGT83A1  | 454 | lcl UGT83A1 similar to UDP-glucose glucosyltransferase                   | 9.00E-172 | 488  | 249/464 (54%) | 318/464 (69%) | full-length |
| chr2.CM1882.280.r2.a   | UGT83A1  | 463 | lcl UGT83A1 similar to UDP-glucose glucosyltransferase                   | 6.00E-123 | 364  | 198/471 (42%) | 283/471 (60%) | full-length |
| chr2.LjT02C03.170.r2.d | UGT91B1  | 232 | lcl UGT91B1 anthocyanidin-3-glucoside rhamnosyltransferase               | 8.00E-50  | 165  | 101/239 (42%) | 136/239 (57%) | full-length |
| chr2.LjT09A09.10.r2.d  | UGT87A1  | 457 | lcl UGT87A1 AC004165, T27E13, 50431-51895                                | 5.00E-152 | 438  | 225/451 (50%) | 299/451 (66%) | pseudo      |
| chr2.LjT09A09.20.r2.d  | UGT87A1  | 447 | lcl UGT87A1 AC004165, T27E13, 50431-51895                                | 9.00E-154 | 442  | 220/449 (49%) | 304/449 (68%) | pseudo      |
| chr2.LjT09A09.30.r2.d  | UGT87A1  | 474 | lcl UGT87A1 AC004165, T27E13, 50431-51895                                | 7.00E-50  | 172  | 81/171 (47%)  | 119/171 (70%) | pseudo      |
| chr2.LjT09A09.80.r2.d  | UGT87A1  | 488 | lcl UGT87A1 AC004165, T27E13, 50431-51895                                | 1.00E-160 | 461  | 232/486 (48%) | 321/486 (66%) | full-length |
| chr3.CM0135.160.r2.d   | UGT72B1  | 516 | lcl UGT72B1 AL161491,75572-77014                                         | 6.00E-126 | 374  | 204/479 (43%) | 285/479 (59%) | full-length |
| chr3.CM0241.610.r2.m   | UGT85A7  | 480 | lcl UGT85A7 AC068562, T16E15.5, 8945-10571                               | 0         | 540  | 244/475 (51%) | 336/475 (71%) | full-length |
| chr3.CM0282.130.r2.d   | UGT79B10 | 174 | lcl UGT79B10 38% identical to Flavonol 3-O-Glucosyltransferase           | 2.00E-42  | 142  | 66/108 (61%)  | 84/108 (78%)  | pseudo      |
| chr3.CM0282.30.r2.d    | UGT79B3  | 191 | lcl UGT79B3 strong similarity to UDP rhamnose--anthocyanidin-3-glucoside | 2.00E-29  | 107  | 63/166 (38%)  | 87/166 (52%)  | pseudo      |

|                        |          |     |                                                                      |           |      |               |               |             |
|------------------------|----------|-----|----------------------------------------------------------------------|-----------|------|---------------|---------------|-------------|
| chr3.CM0282.40.r2.d    | UGT79B1  | 208 | lcl UGT79B1 flavonol 3-O-glucosyltransferase-like                    | 2.00E-47  | 157  | 80/181 (44%)  | 114/181 (63%) | pseudo      |
| chr3.CM0282.590.r2.m   | UGT79B6  | 485 | lcl UGT79B6 AB007644, K19P17, 59557-60918                            | 1.00E-97  | 299  | 144/305 (47%) | 199/305 (65%) | pseudo      |
| chr3.CM0282.950.r2.m   | UGT72D2P | 474 | lcl UGT72D2P AC006135, F24H14, 55344-56752                           | 3.00E-154 | 445  | 230/474 (49%) | 314/474 (66%) | full-length |
| chr3.CM0282.980.r2.m   | UGT72D2P | 470 | lcl UGT72D2P AC006135, F24H14, 55344-56752                           | 2.00E-159 | 458  | 244/475 (51%) | 321/475 (68%) | full-length |
| chr3.CM0574.280.r2.m   | UGT71C4  | 259 | lcl UGT71C4 AC067971, F10K1.4, 14158-15597                           | 2.00E-13  | 62.8 | 64/221 (29%)  | 96/221 (43%)  | pseudo      |
| chr3.CM0574.90.r2.d    | UGT72B1  | 473 | lcl UGT72B1 AL161491, 75572-77014                                    | 5.00E-170 | 486  | 243/470 (52%) | 316/470 (67%) | full-length |
| chr3.CM0619.120.r2.d   | UGT78D1  | 156 | lcl UGT78D1 Contains similarity to gb AF000372 UDP glucose:flavanoid | 1.00E-11  | 55.1 | 28/85 (33%)   | 47/85 (55%)   | partial     |
| chr3.CM0797.150.r2.d   | UGT73B5  | 384 | lcl UGT73B5 putative glucosyltransferase                             | 3.00E-74  | 236  | 117/340 (34%) | 190/340 (56%) | pseudo      |
| chr3.CM0846.120.r2.d   | UGT72B1  | 474 | lcl UGT72B1 AL161491, 75572-77014                                    | 4.00E-148 | 429  | 214/472 (45%) | 318/472 (67%) | full-length |
| chr3.CM0846.130.r2.d   | UGT72B1  | 475 | lcl UGT72B1 AL161491, 75572-77014                                    | 5.00E-84  | 264  | 122/215 (57%) | 160/215 (74%) | pseudo      |
| chr3.LjB09K03.30.r2.m  | UGT92A1  | 484 | lcl UGT92A1 AL353013, T24H18, 21475-22941                            | 0         | 525  | 256/485 (53%) | 340/485 (70%) | full-length |
| chr3.LjT14J20.130.r2.m | UGT79B11 | 138 | lcl UGT79B11 37% identical to Flavonol 3-O-Glucosyltransferase       | 1.00E-31  | 111  | 47/81 (58%)   | 63/81 (78%)   | pseudo      |
| chr3.LjT14J20.160.r2.m | UGT79B6  | 459 | lcl UGT79B6 AB007644, K19P17, 59557-60918                            | 8.00E-161 | 460  | 222/456 (49%) | 305/456 (67%) | full-length |
| chr3.LjT14J20.170.r2.m | UGT79B6  | 469 | lcl UGT79B6 AB007644, K19P17, 59557-60918                            | 7.00E-150 | 433  | 214/456 (47%) | 297/456 (65%) | full-length |
| chr3.LjT24D06.90.r2.d  | UGT85A2  | 252 | lcl UGT85A2 chromosome 1                                             | 9.00E-77  | 237  | 115/168 (68%) | 139/168 (83%) | partial     |
| chr3.LjT35O23.150.r2.d | UGT72D1  | 487 | lcl UGT72D1 putative flavonol 3-O-glucosyltransferase                | 1.00E-130 | 385  | 202/479 (42%) | 307/479 (64%) | full-length |
| chr3.LjT41F16.10.r2.d  | UGT72B3  | 245 | lcl UGT72B3 AC023628, F6F3.22, 95474-96919                           | 1.00E-74  | 231  | 118/241 (49%) | 165/241 (68%) | partial     |
| chr3.LjT41F16.40.r2.d  | UGT72B1  | 260 | lcl UGT72B1 AL161491, 75572-77014                                    | 2.00E-93  | 280  | 130/210 (62%) | 172/210 (82%) | partial     |
| chr3.LjT45I18.30.r2.d  | UGT85A7  | 481 | lcl UGT85A7 AC068562, T16E15.5, 8945-10571                           | 0         | 533  | 242/478 (51%) | 335/478 (70%) | full-length |
| chr4.CM0042.1820.r2.m  | UGT81A4  | 457 | lcl UGT81A4 AB047398, MGDG synthase type C                           | 1.00E-06  | 43.1 | 38/120 (32%)  | 56/120 (47%)  | pseudo      |
| chr4.CM0044.480.r2.m   | UGT75D1  | 446 | lcl UGT75D1 transfers the glucose moiety from UDP-glucose            | 7.00E-119 | 353  | 197/464 (42%) | 274/464 (59%) | pseudo      |
| chr4.CM0044.490.r2.m   | UGT75B1  | 457 | lcl UGT75B1 hypothetical UDP-glucose:anthocyanin                     | 2.00E-141 | 411  | 223/465 (48%) | 298/465 (64%) | full-length |
| chr4.CM0175.320.r2.m   | UGT81A4  | 73  | lcl UGT81A4 AB047398, MGDG synthase type C                           | 4.00E-18  | 71.2 | 36/68 (53%)   | 47/68 (69%)   | partial     |
| chr4.CM0219.90.r2.d    | UGT81A3  | 462 | lcl UGT81A3 AJ000331, monogalactosyl diacylglycerol synthase         | 0         | 674  | 345/469 (74%) | 391/469 (83%) | full-length |
| chr4.CM0227.640.r2.m   | UGT73B4  | 474 | lcl UGT73B4 AC006248, F26H6, 11756-13404                             | 2.00E-141 | 412  | 214/486 (44%) | 300/486 (62%) | full-length |
| chr4.CM0227.650.r2.m   | UGT73B4  | 472 | lcl UGT73B4 AC006248, F26H6, 11756-13404                             | 4.00E-176 | 501  | 247/482 (51%) | 330/482 (68%) | full-length |

|                       |         |     |                                                             |           |      |               |               |             |
|-----------------------|---------|-----|-------------------------------------------------------------|-----------|------|---------------|---------------|-------------|
| chr4.CM0227.660.r2.m  | UGT73B3 | 485 | lcl UGT73B3 AL021961, F28A23                                | 0         | 514  | 256/481 (53%) | 340/481 (71%) | full-length |
| chr4.CM0227.690.r2.m  | UGT73B3 | 486 | lcl UGT73B3 AL021961, F28A23                                | 0         | 539  | 274/489 (56%) | 351/489 (72%) | full-length |
| chr4.CM0387.270.r2.d  | UGT73B4 | 472 | lcl UGT73B4 AC006248, F26H6, 11756-13404                    | 8.00E-129 | 380  | 205/484 (42%) | 288/484 (60%) | full-length |
| chr4.CM0387.340.r2.d  | UGT73B4 | 507 | lcl UGT73B4 AC006248, F26H6, 11756-13404                    | 3.00E-131 | 387  | 208/482 (43%) | 295/482 (61%) | full-length |
| chr4.CM0387.360.r2.d  | UGT73B4 | 466 | lcl UGT73B4 AC006248, F26H6, 11756-13404                    | 2.00E-124 | 369  | 201/484 (42%) | 283/484 (58%) | full-length |
| chr4.CM0387.370.r2.d  | UGT73B4 | 481 | lcl UGT73B4 AC006248, F26H6, 11756-13404                    | 8.00E-131 | 385  | 209/491 (43%) | 289/491 (59%) | full-length |
| chr4.CM0387.390.r2.d  | UGT73B4 | 494 | lcl UGT73B4 AC006248, F26H6, 11756-13404                    | 2.00E-137 | 403  | 214/488 (44%) | 303/488 (62%) | full-length |
| chr4.CM0414.390.r2.d  | UGT85A2 | 177 | lcl UGT85A2 chromosome 1                                    | 3.00E-67  | 209  | 92/164 (56%)  | 117/164 (71%) | partial     |
| chr4.CM0528.110.r2.d  | UGT84B2 | 465 | lcl UGT84B2 AC002391, F21P24, 56464-57816                   | 1.00E-140 | 409  | 207/458 (45%) | 296/458 (65%) | full-length |
| chr5.CM0034.480.r2.d  | UGT73C7 | 116 | lcl UGT73C7 strong similarity to glucosyltransferase ISSa,  | 9.00E-09  | 45.4 | 19/48 (40%)   | 33/48 (69%)   | partial     |
| chr5.CM0040.760.r2.m  | UGT81A3 | 53  | lcl UGT81A3 AJ000331, monogalactosyldiacylglycerol synthase | 9.00E-11  | 49.3 | 18/23 (78%)   | 20/23 (87%)   | pseudo      |
| chr5.CM0052.810.r2.m  | UGT80B1 | 638 | lcl UGT80B1 NM_103487, GI:18400961                          | 0         | 879  | 437/620 (70%) | 512/620 (83%) | full-length |
| chr5.CM0200.3220.r2.m | UGT84A1 | 479 | lcl UGT84A1 similarity to indole-3-acetate                  | 0         | 519  | 244/468 (52%) | 343/468 (73%) | full-length |
| chr5.CM0200.3230.r2.m | UGT84B1 | 490 | lcl UGT84B1 putative glucosyltransferase                    | 1.00E-136 | 400  | 213/481 (44%) | 304/481 (63%) | full-length |
| chr5.CM0278.660.r2.m  | UGT73C3 | 477 | lcl UGT73C3 putative glucosyltransferase                    | 3.00E-60  | 201  | 148/498 (30%) | 241/498 (48%) | full-length |
| chr5.CM1077.490.r2.m  | UGT73C1 | 484 | lcl UGT73C1 putative glucosyltransferase                    | 3.00E-112 | 338  | 175/350 (50%) | 230/350 (66%) | pseudo      |
| chr5.CM1077.550.r2.m  | UGT73C3 | 497 | lcl UGT73C3 putative glucosyltransferase                    | 5.00E-156 | 451  | 229/498 (46%) | 338/498 (68%) | full-length |
| chr5.CM1077.560.r2.m  | UGT73D1 | 234 | lcl UGT73D1 strong similarity to glucosyltransferase IS10a, | 2.00E-64  | 205  | 100/232 (43%) | 157/232 (68%) | partial     |
| chr5.CM1077.590.r2.m  | UGT73C2 | 484 | lcl UGT73C2 putative glucosyltransferase                    | 0         | 542  | 265/489 (54%) | 346/489 (71%) | full-length |
| chr5.CM1077.600.r2.m  | UGT73C3 | 498 | lcl UGT73C3 putative glucosyltransferase                    | 6.00E-156 | 451  | 226/496 (46%) | 336/496 (68%) | full-length |
| chr5.CM1077.610.r2.m  | UGT73C1 | 499 | lcl UGT73C1 putative glucosyltransferase                    | 5.00E-174 | 497  | 241/486 (50%) | 344/486 (71%) | full-length |
| chr5.CM1077.630.r2.m  | UGT73D1 | 487 | lcl UGT73D1 strong similarity to glucosyltransferase IS10a, | 0         | 619  | 295/493 (60%) | 387/493 (78%) | full-length |
| chr5.CM2155.140.r2.a  | UGT72B3 | 478 | lcl UGT72B3 AC023628, F6F3.22, 95474-96919                  | 6.00E-124 | 368  | 208/488 (43%) | 302/488 (62%) | full-length |
| chr6.CM0055.510.r2.m  | UGT78D2 | 454 | lcl UGT78D2 AL391141, F2K13, 64922-66486                    | 9.00E-144 | 417  | 204/450 (45%) | 294/450 (65%) | full-length |
| chr6.CM0114.250.r2.m  | UGT79B6 | 456 | lcl UGT79B6 AB007644, K19P17, 59557-60918                   | 1.00E-164 | 470  | 219/454 (48%) | 311/454 (69%) | full-length |
| chr6.CM0118.1240.r2.d | UGT72E1 | 469 | lcl UGT72E1 Contains UDP-glycosyltransferases signature     | 4.00E-114 | 342  | 187/464 (40%) | 283/464 (61%) | full-length |

|                        |         |     |                                                                          |           |      |               |               |             |
|------------------------|---------|-----|--------------------------------------------------------------------------|-----------|------|---------------|---------------|-------------|
| chr6.CM0118.1250.r2.d  | UGT72E1 | 465 | lcl UGT72E1 Contains UDP-glycosyltransferases signature                  | 6.00E-82  | 258  | 143/345 (41%) | 213/345 (62%) | pseudo      |
| chr6.CM0314.440.r2.m   | UGT91A1 | 477 | lcl UGT91A1 putative anthocyanidin-3-glucoside                           | 1.00E-130 | 384  | 194/474 (41%) | 293/474 (62%) | full-length |
| chr6.CM0314.450.r2.m   | UGT91A1 | 476 | lcl UGT91A1 putative anthocyanidin-3-glucoside                           | 3.00E-127 | 375  | 195/468 (42%) | 287/468 (61%) | full-length |
| chr6.CM0314.490.r2.m   | UGT91A1 | 490 | lcl UGT91A1 putative anthocyanidin-3-glucoside                           | 7.00E-139 | 406  | 212/477 (44%) | 292/477 (61%) | full-length |
| chr6.CM0314.500.r2.d   | UGT85A2 | 482 | lcl UGT85A2 chromosome 1                                                 | 0         | 567  | 259/476 (54%) | 357/476 (75%) | pseudo      |
| chr6.CM0367.140.r2.m   | UGT73C3 | 481 | lcl UGT73C3 putative glucosyltransferase                                 | 6.00E-108 | 327  | 184/490 (38%) | 272/490 (56%) | full-length |
| chr6.CM1757.170.r2.a   | UGT81A4 | 57  | lcl UGT81A4 AB047398, MGDG synthase type C                               | 6.00E-25  | 89.7 | 40/57 (70%)   | 45/57 (79%)   | pseudo      |
| chr6.LjT14E02.150.r2.d | UGT76F2 | 460 | lcl UGT76F2 AL161667, F1116, 59290-61366                                 | 2.00E-172 | 490  | 249/469 (53%) | 328/469 (70%) | full-length |
| LjSGA_003166.2         | UGT85A2 | 484 | lcl UGT85A2 chromosome 1                                                 | 0         | 665  | 318/485 (66%) | 394/485 (81%) | full-length |
| LjSGA_004982.1         | UGT79B3 | 262 | lcl UGT79B3 strong similarity to UDP rhamnose--anthocyanidin-3-glucoside | 5.00E-109 | 320  | 158/255 (62%) | 188/255 (74%) | partial     |
| LjSGA_013199.1         | UGT71B6 | 138 | lcl UGT71B6 AB025634, MSD21, 33372-31939                                 | 2.00E-15  | 65.9 | 47/136 (35%)  | 70/136 (51%)  | pseudo      |
| LjSGA_014618.2         | UGT73B4 | 228 | lcl UGT73B4 AC006248, F26H6, 11756-13404                                 | 5.00E-58  | 187  | 108/217 (50%) | 137/217 (63%) | partial     |
| LjSGA_015360.1         | UGT74F1 | 459 | lcl UGT74F1 putative glucosyltransferase                                 | 6.00E-149 | 430  | 208/450 (46%) | 305/450 (68%) | full-length |
| LjSGA_015919.1         | UGT72E1 | 508 | lcl UGT72E1 Contains UDP-glycosyltransferases signature                  | 9.00E-159 | 458  | 238/473 (50%) | 324/473 (68%) | full-length |
| LjSGA_016571.1         | UGT72B1 | 489 | lcl UGT72B1 AL161491, 75572-77014                                        | 4.00E-160 | 461  | 233/476 (49%) | 313/476 (66%) | full-length |
| LjSGA_021337.2         | UGT80B1 | 147 | lcl UGT80B1 NM_103487, GI:18400961                                       | 9.00E-65  | 204  | 101/136 (74%) | 117/136 (86%) | pseudo      |
| LjSGA_021883.1         | UGT71C3 | 177 | lcl UGT71C3 AC067971, F10K1.3, 12382-13812                               | 6.00E-68  | 211  | 101/175 (58%) | 133/175 (76%) | partial     |
| LjSGA_023327.1         | UGT85A3 | 153 | lcl UGT85A3 AC006551, F12K8, 105703-107198; AC068562, T16E15, 1-513      | 2.00E-21  | 83.6 | 54/154 (35%)  | 73/154 (47%)  | partial     |
| LjSGA_024674.1         | UGT80B1 | 102 | lcl UGT80B1 NM_103487, GI:18400961                                       | 2.00E-24  | 90.9 | 37/45 (82%)   | 41/45 (91%)   | pseudo      |
| LjSGA_025093.1         | UGT72B1 | 270 | lcl UGT72B1 AL161491, 75572-77014                                        | 9.00E-105 | 310  | 149/269 (55%) | 198/269 (74%) | partial     |
| LjSGA_027597.1         | UGT73B1 | 472 | lcl UGT73B1 AL021961, F28A23                                             | 2.00E-106 | 323  | 195/485 (40%) | 280/485 (58%) | partial     |
| LjSGA_028050.1         | UGT91A1 | 473 | lcl UGT91A1 putative anthocyanidin-3-glucoside                           | 3.00E-130 | 383  | 206/459 (45%) | 280/459 (61%) | full-length |
| LjSGA_028537.1         | UGT85A2 | 308 | lcl UGT85A2 chromosome 1                                                 | 7.00E-73  | 229  | 122/301 (41%) | 184/301 (61%) | partial     |
| LjSGA_029106.1         | UGT79B6 | 414 | lcl UGT79B6 AB007644, K19P17, 59557-60918                                | 6.00E-134 | 390  | 187/410 (46%) | 271/410 (66%) | partial     |
| LjSGA_029279.2         | UGT79B1 | 307 | lcl UGT79B1 flavonol 3-O-glucosyltransferase-like                        | 6.00E-97  | 291  | 147/316 (47%) | 206/316 (65%) | pseudo      |
| LjSGA_030028.1         | UGT80A2 | 142 | lcl UGT80A2 Z83833, UDP-glucose:sterol glucosyltransferase               | 5.00E-59  | 189  | 84/111 (76%)  | 96/111 (86%)  | partial     |

|                  |          |     |                                                                          |           |      |               |               |         |
|------------------|----------|-----|--------------------------------------------------------------------------|-----------|------|---------------|---------------|---------|
| LjSGA_032065.1   | UGT72D2P | 274 | lcl UGT72D2P AC006135, F24H14, 55344-56752                               | 1.00E-41  | 144  | 70/136 (51%)  | 96/136 (71%)  | pseudo  |
| LjSGA_032783.2   | UGT87A1  | 188 | lcl UGT87A1 AC004165, T27E13, 50431-51895                                | 7.00E-40  | 136  | 69/148 (47%)  | 94/148 (64%)  | partial |
| LjSGA_033686.1   | UGT73B3  | 242 | lcl UGT73B3 AL021961, F28A23                                             | 4.00E-51  | 169  | 89/246 (36%)  | 141/246 (57%) | partial |
| LjSGA_037880.1   | UGT85A5  | 183 | lcl UGT85A5 AC068562, T16E15.2, 1156-2919                                | 2.00E-68  | 213  | 86/168 (51%)  | 126/168 (75%) | partial |
| LjSGA_040125.1   | UGT81A1  | 200 | lcl UGT81A1 monogalactosyl diacylglycerol synthase - like protein        | 2.00E-103 | 305  | 142/186 (76%) | 158/186 (85%) | pseudo  |
| LjSGA_040150.1   | UGT78D2  | 180 | lcl UGT78D2 AL391141, F2K13, 64922-66486                                 | 2.00E-53  | 172  | 80/159 (50%)  | 111/159 (70%) | partial |
| LjSGA_042817.1   | UGT73C4  | 437 | lcl UGT73C4 putative glucosyltransferase                                 | 3.00E-58  | 195  | 142/450 (32%) | 214/450 (48%) | partial |
| LjSGA_043170.1   | UGT78D1  | 32  | lcl UGT78D1 Contains similarity to gb AF000372 UDP glucose:flavanoid     | 4.00E-06  | 34.7 | 17/26 (65%)   | 21/26 (81%)   | partial |
| LjSGA_044016.1   | UGT85A2  | 152 | lcl UGT85A2 chromosome 1                                                 | 2.00E-59  | 188  | 84/149 (56%)  | 109/149 (73%) | partial |
| LjSGA_044094.1   | UGT85A6P | 168 | lcl UGT85A6P AC068562, T16E15.4, 6537-8157                               | 5.00E-69  | 214  | 98/169 (58%)  | 130/169 (77%) | partial |
| LjSGA_045743.1   | UGT88A1  | 145 | lcl UGT88A1 flavonol 3-O-glucosyltransferase-like protein                | 1.00E-20  | 81.3 | 41/119 (34%)  | 62/119 (52%)  | partial |
| LjSGA_045779.1.1 | UGT78D2  | 104 | lcl UGT78D2 AL391141, F2K13, 64922-66486                                 | 4.00E-21  | 80.9 | 42/101 (42%)  | 62/101 (61%)  | partial |
| LjSGA_046111.1   | UGT73B3  | 272 | lcl UGT73B3 AL021961, F28A23                                             | 2.00E-51  | 171  | 96/271 (35%)  | 151/271 (56%) | partial |
| LjSGA_046960.1   | UGT79B1  | 265 | lcl UGT79B1 flavonol 3-O-glucosyltransferase-like                        | 3.00E-75  | 233  | 118/269 (44%) | 167/269 (62%) | partial |
| LjSGA_047409.1   | UGT85A2  | 75  | lcl UGT85A2 chromosome 1                                                 | 4.00E-30  | 104  | 44/65 (68%)   | 53/65 (82%)   | partial |
| LjSGA_047474.1   | UGT91C1  | 237 | lcl UGT91C1 anthocyanidin-3-glucoside                                    | 5.00E-79  | 242  | 113/233 (48%) | 156/233 (67%) | partial |
| LjSGA_047571.1   | UGT72B3  | 286 | lcl UGT72B3 AC023628, F6F3.22, 95474-96919                               | 9.00E-60  | 194  | 120/286 (42%) | 170/286 (59%) | partial |
| LjSGA_047870.1   | UGT73C3  | 166 | lcl UGT73C3 putative glucosyltransferase                                 | 1.00E-34  | 120  | 75/176 (43%)  | 98/176 (56%)  | partial |
| LjSGA_048307.1   | UGT71B1  | 259 | lcl UGT71B1 AB025634, MSD21, 21447-22865                                 | 8.00E-30  | 110  | 80/259 (31%)  | 134/259 (52%) | partial |
| LjSGA_048844.2.1 | UGT92A1  | 164 | lcl UGT92A1 AL353013, T24H18, 21475-22941                                | 6.00E-15  | 65.1 | 32/57 (56%)   | 45/57 (79%)   | pseudo  |
| LjSGA_049701.1   | UGT80A2  | 127 | lcl UGT80A2 Z83833, UDP-glucose:sterol glucosyltransferase               | 6.00E-45  | 149  | 74/106 (70%)  | 80/106 (75%)  | pseudo  |
| LjSGA_050341.1   | UGT71D2  | 190 | lcl UGT71D2 AC005496, T27A16, 40783-42186                                | 3.00E-38  | 131  | 72/192 (38%)  | 113/192 (59%) | partial |
| LjSGA_052002.1   | UGT73C3  | 334 | lcl UGT73C3 putative glucosyltransferase                                 | 2.00E-103 | 310  | 156/335 (47%) | 224/335 (67%) | partial |
| LjSGA_052966.2   | UGT72C1  | 156 | lcl UGT72C1 strong similarity to UDP-glucose                             | 5.00E-33  | 115  | 55/116 (47%)  | 77/116 (66%)  | pseudo  |
| LjSGA_053314.2   | UGT72B3  | 194 | lcl UGT72B3 AC023628, F6F3.22, 95474-96919                               | 1.00E-50  | 166  | 86/193 (45%)  | 117/193 (61%) | partial |
| LjSGA_060963.2   | UGT79B3  | 143 | lcl UGT79B3 strong similarity to UDP rhamnose--anthocyanidin-3-glucoside | 1.00E-46  | 152  | 65/135 (48%)  | 103/135 (76%) | pseudo  |

|                  |          |     |                                                                                 |           |      |               |               |         |
|------------------|----------|-----|---------------------------------------------------------------------------------|-----------|------|---------------|---------------|---------|
| LjSGA_063463.1   | UGT80B1  | 61  | lcl UGT80B1 NM_103487, GI:18400961                                              | 2.00E-24  | 89.4 | 41/64 (64%)   | 49/64 (77%)   | partial |
| LjSGA_065630.1   | UGT73B2  | 194 | lcl UGT73B2 AL021961, F28A23                                                    | 3.00E-47  | 157  | 76/192 (40%)  | 111/192 (58%) | partial |
| LjSGA_066071.1   | UGT85A2  | 201 | lcl UGT85A2 chromosome 1                                                        | 8.00E-71  | 219  | 97/162 (60%)  | 123/162 (76%) | pseudo  |
| LjSGA_066183.1   | UGT88A1  | 301 | lcl UGT88A1 flavonol 3-O-glucosyltransferase-like protein                       | 3.00E-97  | 291  | 154/298 (52%) | 202/298 (68%) | partial |
| LjSGA_068283.2   | UGT89A1P | 341 | lcl UGT89A1P AAD30635-1, possibly a pseudogene (gene is about 30 aa too short). | 1.00E-07  | 45.8 | 26/86 (30%)   | 45/86 (52%)   | pseudo  |
| LjSGA_071709.1   | UGT79B3  | 281 | lcl UGT79B3 strong similarity to UDP rhamnose--anthocyanidin-3-glucoside        | 3.00E-96  | 288  | 146/278 (53%) | 185/278 (67%) | partial |
| LjSGA_071841.2   | UGT73B5  | 408 | lcl UGT73B5 putative glucosyltransferase                                        | 4.00E-103 | 311  | 170/414 (41%) | 248/414 (60%) | partial |
| LjSGA_076799.1   | UGT71B2  | 266 | lcl UGT71B2 AB025634, MSD21, 23981-25438                                        | 2.00E-92  | 278  | 140/261 (54%) | 184/261 (70%) | pseudo  |
| LjSGA_077173.1   | UGT81A1  | 178 | lcl UGT81A1 monogalactosyldiacylglycerol synthase - like protein                | 4.00E-34  | 120  | 85/187 (45%)  | 106/187 (57%) | partial |
| LjSGA_083752.1   | UGT81A1  | 38  | lcl UGT81A1 monogalactosyldiacylglycerol synthase - like protein                | 2.00E-23  | 84.7 | 37/38 (97%)   | 37/38 (97%)   | partial |
| LjSGA_084705.1   | UGT71C3  | 266 | lcl UGT71C3 AC067971, F10K1.3, 12382-13812                                      | 2.00E-94  | 283  | 133/265 (50%) | 188/265 (71%) | partial |
| LjSGA_086482.1   | UGT74F1  | 311 | lcl UGT74F1 putative glucosyltransferase                                        | 1.00E-95  | 287  | 144/303 (48%) | 205/303 (68%) | partial |
| LjSGA_091755.2   | UGT85A7  | 231 | lcl UGT85A7 AC068562, T16E15.5, 8945-10571                                      | 7.00E-91  | 273  | 125/215 (58%) | 170/215 (79%) | partial |
| LjSGA_092302.1   | UGT73C3  | 271 | lcl UGT73C3 putative glucosyltransferase                                        | 1.00E-73  | 230  | 118/250 (47%) | 164/250 (66%) | partial |
| LjSGA_095026.1   | UGT72E1  | 359 | lcl UGT72E1 Contains UDP-glycosyltransferases signature                         | 1.00E-77  | 243  | 123/249 (49%) | 166/249 (67%) | pseudo  |
| LjSGA_096934.1   | UGT79B6  | 304 | lcl UGT79B6 AB007644, K19P17, 59557-60918                                       | 8.00E-95  | 285  | 145/306 (47%) | 205/306 (67%) | partial |
| LjSGA_098269.1   | UGT71D1  | 185 | lcl UGT71D1 AC005496, T27A16, 45718-47121                                       | 1.00E-36  | 127  | 70/184 (38%)  | 114/184 (62%) | partial |
| LjSGA_102534.1   | UGT85A5  | 154 | lcl UGT85A5 AC068562, T16E15.2, 1156-2919                                       | 5.00E-55  | 176  | 82/146 (56%)  | 106/146 (73%) | partial |
| LjSGA_104176.1   | UGT88A1  | 205 | lcl UGT88A1 flavonol 3-O-glucosyltransferase-like protein                       | 2.00E-73  | 226  | 112/205 (55%) | 148/205 (72%) | partial |
| LjSGA_108549.1   | UGT71D1  | 147 | lcl UGT71D1 AC005496, T27A16, 45718-47121                                       | 4.00E-30  | 107  | 56/135 (41%)  | 87/135 (64%)  | partial |
| LjSGA_114591.1   | UGT88A1  | 215 | lcl UGT88A1 flavonol 3-O-glucosyltransferase-like protein                       | 5.00E-70  | 218  | 109/203 (54%) | 146/203 (72%) | pseudo  |
| LjSGA_126577.1   | UGT71C3  | 295 | lcl UGT71C3 AC067971, F10K1.3, 12382-13812                                      | 3.00E-98  | 294  | 141/296 (48%) | 201/296 (68%) | partial |
| LjSGA_128268.1   | UGT72B1  | 223 | lcl UGT72B1 AL161491, 75572-77014                                               | 1.00E-92  | 277  | 131/225 (58%) | 175/225 (78%) | partial |
| LjSGA_146123.1.1 | UGT88A1  | 208 | lcl UGT88A1 flavonol 3-O-glucosyltransferase-like protein                       | 6.00E-30  | 108  | 78/202 (39%)  | 113/202 (56%) | pseudo  |
| LjSGA_148423.1   | UGT72B1  | 171 | lcl UGT72B1 AL161491, 75572-77014                                               | 6.00E-45  | 149  | 82/169 (49%)  | 111/169 (66%) | partial |
| LjSGA_150111.1   | UGT71B7  | 184 | lcl UGT71B7 AB025634, MSD21, 33809-35296                                        | 3.00E-33  | 117  | 56/106 (53%)  | 75/106 (71%)  | pseudo  |

|                   |         |     |                                              |           |      |               |               |             |
|-------------------|---------|-----|----------------------------------------------|-----------|------|---------------|---------------|-------------|
| LjSGA_150780.1    | UGT87A2 | 51  | lcl UGT87A2 putative glucosyltransferase     | 1.00E-07  | 40.4 | 20/44 (45%)   | 29/44 (66%)   | partial     |
| LjT01K14.20.r2.d  | UGT74F1 | 458 | lcl UGT74F1 putative glucosyltransferase     | 5.00E-150 | 432  | 218/448 (49%) | 307/448 (69%) | full-length |
| LjT06A15.20.r2.d  | UGT87A2 | 61  | lcl UGT87A2 putative glucosyltransferase     | 5.00E-09  | 44.7 | 24/77 (31%)   | 39/77 (51%)   | partial     |
| LjT09A12.10.r2.m  | UGT73B3 | 474 | lcl UGT73B3 AL021961, F28A23                 | 6.00E-62  | 205  | 144/487 (30%) | 238/487 (49%) | full-length |
| LjT09A12.20.r2.m  | UGT73B3 | 475 | lcl UGT73B3 AL021961, F28A23                 | 2.00E-58  | 196  | 141/486 (29%) | 234/486 (48%) | full-length |
| LjT09A12.30.r2.m  | UGT72C1 | 177 | lcl UGT72C1 strong similarity to UDP-glucose | 1.00E-41  | 140  | 73/166 (44%)  | 105/166 (63%) | partial     |
| LjT09A12.60.r2.m  | UGT73B4 | 477 | lcl UGT73B4 AC006248, F26H6, 11756-13404     | 2.00E-53  | 182  | 135/491 (27%) | 232/491 (47%) | full-length |
| LjT09A12.80.r2.m  | UGT73B3 | 473 | lcl UGT73B3 AL021961, F28A23                 | 4.00E-56  | 189  | 147/484 (30%) | 230/484 (48%) | full-length |
| LjT38K16.60.r2.a  | UGT73B4 | 405 | lcl UGT73B4 AC006248, F26H6, 11756-13404     | 2.00E-59  | 197  | 106/229 (46%) | 143/229 (62%) | pseudo      |
| LjT44J06.210.r2.d | UGT89B1 | 434 | lcl UGT89B1 AC016662, F2P9, 86614-88035      | 2.00E-99  | 303  | 178/406 (44%) | 241/406 (59%) | pseudo      |
| LjT46F11.10.r2.a  | UGT90A1 | 399 | lcl UGT90A1 AC005167, F12A24, 24146-26230    | 5.00E-148 | 426  | 218/407 (54%) | 281/407 (69%) | partial     |
| LjT48O01.70.r2.d  | UGT81A4 | 86  | lcl UGT81A4 AB047398, MGDG synthase type C   | 2.00E-25  | 92   | 37/59 (63%)   | 46/59 (78%)   | pseudo      |



**Table S2 List of full-length *UGT* genes and their corresponding probe set number on the Affymetrix genechip**

| Kazusa identifier      | Name     | Probe set number    | e value  |
|------------------------|----------|---------------------|----------|
| chr1.CM0012.2370.r2.a  | UGT73C17 | chr1.CM0012.80_at   | 4.00E-23 |
| chr2.CM0533.380.r2.a   | UGT708D2 | Ljwgs_022630.3_at   | 0        |
| chr1.LjT10H09.40.r2.m  | UGT72AD1 | chr1.TM0189.6_s_at  | 0        |
| chr3.CM0135.160.r2.d   | UGT72AD2 | chr3.CM0135.10_at   | 0        |
| chr5.CM2155.140.r2.a   | UGT72AE1 | Ljwgs_011402.3_at   | 0        |
| chr6.CM0118.1240.r2.d  | UGT72AF1 | TM0674.25_at        | 0        |
| LjSGA_015919.1         | UGT72AG1 | Ljwgs_015919.1_at   | 0        |
| chr3.CM0846.120.r2.d   | UGT72AH1 | chr3.TM0984.8_at    | 0        |
| chr1.CM0105.690.r2.a   | UGT72B4  | chr1.CM0579.4_at    | 0        |
| chr5.CM0200.3220.r2.m  | UGT84F5  | chr5.CM0200.56_at   | 0        |
| chr3.LjT35O23.150.r2.d | UGT72K1  | chr3.TM1465.1_at    | 0        |
| chr3.CM0574.90.r2.d    | UGT72L6  | chr3.CM0574.27_at   | 0        |
| chr3.CM0282.980.r2.m   | UGT72V2  | chr3.CM0282.132_at  | 0        |
| chr3.CM0282.950.r2.m   | UGT72V3  | chr3.CM0282.124_at  | 0        |
| LjSGA_016571.1         | UGT72Z2  | Ljwgs_016571.1_at   | 0        |
| chr5.CM1077.610.r2.m   | UGT73AA2 | Ljwgs_092302.1_at   | 1.00E-16 |
| chr5.CM1077.630.r2.m   | UGT73AB2 | chr1.CM0012.80_at   | 3.00E-08 |
| chr4.CM0227.640.r2.m   | UGT73AC2 | Ljwgs_009735.1_at   | 0        |
| chr5.CM1077.550.r2.m   | UGT73AJ1 | chr1.CM0012.80_at   | 5.00E-07 |
| chr5.CM1077.600.r2.m   | UGT73AJ2 | chr1.CM0012.80_at   | 8.00E-12 |
| chr6.CM0367.140.r2.m   | UGT73AK1 | Ljwgs_135723.1_s_at | 0        |
| chr1.CM0088.150.r2.d   | UGT73B17 | chr1.CM0088.14_at   | 0        |
| chr1.CM0591.560.r2.d   | UGT73B18 | chr1.CM0591.45.1_at | 0        |
| chr1.CM0109.320.r2.m   | UGT73B19 | chr1.CM0109.36_at   | 0        |

|                        |          |                   |          |
|------------------------|----------|-------------------|----------|
| chr4.CM0227.690.r2.m   | UGT73B20 | Ljwgs_012092.1_at | 0        |
| chr4.CM0227.660.r2.m   | UGT73B21 | Ljwgs_012092.1_at | 1.00E-44 |
| chr4.CM0227.650.r2.m   | UGT73B22 | Ljwgs_012092.1_at | 8.00E-15 |
| chr5.CM1077.590.r2.m   | UGT73C18 | Ljwgs_053613.2_at | 0        |
| chr4.CM0387.340.r2.d   | UGT73F10 | chr4.CM0739.7_at  | 0        |
| chr4.CM0387.390.r2.d   | UGT73F11 | chr4.CM0739.20_at | 0        |
| chr4.CM0387.370.r2.d   | UGT73F12 | chr4.CM0739.17_at | 0        |
| chr4.CM0387.270.r2.d   | UGT73F8  | chr4.CM0739.4_at  | 0        |
| chr4.CM0387.360.r2.d   | UGT73F9  | chr4.CM0739.16_at | 0        |
| LjT01K14.20.r2.d       | UGT74K1  | TM1443.6_at       | 0        |
| LjSGA_015360.1         | UGT74K3  | Ljwgs_015360.1_at | 0        |
| chr1.CM0393.980.r2.m   | UGT74X3  | Ljwgs_051780.1_at | 0        |
| chr1.CM0393.1120.r2.d  | UGT74X4  | chr4.CM0165.11_at | 0        |
| chr4.CM0044.490.r2.m   | UGT75L15 | chr4.CM0044.55_at | 0        |
| chr6.LjT14E02.150.r2.d | UGT76J1  | TM1445.31_at      | 0        |
| chr6.CM0055.510.r2.m   | UGT78K9  | chr6.CM0055.30_at | 0        |
| chr3.LjT14J20.170.r2.m | UGT79B12 | chr3.TM0388.25_at | 0        |
| chr3.LjT14J20.160.r2.m | UGT79B13 | chr3.TM0388.23_at | 0        |
| chr6.CM0114.250.r2.m   | UGT79B14 | TM1489.2_at       | 0        |
| chr5.CM0052.810.r2.m   | UGT80B12 | chr5.CM0052.35_at | 0        |
| chr4.CM0219.90.r2.d    | UGT81A5  | chr4.CM0219.14_at | 0        |
| chr1.CM0410.140.r2.m   | UGT83G2  | chr1.CM0410.56_at | 0        |
| chr1.CM0410.100.r2.m   | UGT83G5  | chr1.CM0410.64_at | 0        |
| chr1.CM0410.110.r2.m   | UGT83G6  | chr1.CM0410.62_at | 0        |
| chr1.CM0410.130.r2.m   | UGT83G7  | chr1.CM0410.62_at | 0        |
| chr1.CM0410.150.r2.m   | UGT83G8  | chr1.CM0410.54_at | 0        |

|                       |          |                     |       |
|-----------------------|----------|---------------------|-------|
| chr2.CM1882.280.r2.a  | UGT83J1  | Ljwgs_022207.1_at   | 0     |
| chr2.CM1882.260.r2.a  | UGT83K1  | Ljwgs_060242.1_at   | 0     |
| chr4.CM0528.110.r2.d  | UGT84H2  | CM0528.29_at        | 0     |
| chr5.CM0200.3230.r2.m | UGT84L1  | chr5.CM0200.54_at   | 0     |
| LjSGA_003166.2        | UGT85A11 | Ljwgs_003166.2_at   | 0     |
| chr2.CM0124.440.r2.m  | UGT85H1  | Ljwgs_091755.2_at   | E-172 |
| chr3.LjT45I18.30.r2.d | UGT85K2  | TM1472.14_at        | 0     |
| chr3.CM0241.610.r2.m  | UGT85K3  | Ljwgs_024479.1_s_at | 0     |
| chr2.LjT09A09.80.r2.d | UGT87E1  | chr2.TM0889.12_at   | 0     |
| chr1.CM1868.190.r2.m  | UGT89B6  | Ljwgs_032790.2_at   | 0     |
| chr2.CM0124.1460.r2.m | UGT89D1  | chr2.CM0124.5_at    | 0     |
| chr6.CM0314.440.r2.m  | UGT91H1  | chr6.CM0314.44_at   | 0     |
| chr6.CM0314.450.r2.m  | UGT91H2  | chr6.CM0314.45_at   | 0     |
| chr6.CM0314.490.r2.m  | UGT91H3  | chr6.CM0314.48_at   | 0     |
| LjSGA_028050.1        | UGT91N2  | Ljwgs_028050.1_at   | 0     |
| chr3.LjB09K03.30.r2.m | UGT92A2  | chr3.BM1720.10_at   | 0     |
| LjT09A12.80.r2.m      | UGT93A10 | TM0748.5_x_at       | 0     |
| chr5.CM0278.660.r2.m  | UGT93A6  | TM0748.2_x_at       | E-108 |
| LjT09A12.10.r2.m      | UGT93A7  | TM0748.2_x_at       | 0     |
| LjT09A12.20.r2.m      | UGT93A8  | TM0748.2_x_at       | 0     |
| LjT09A12.60.r2.m      | UGT93A9  | TM0748.9_x_at       | 0     |

---

Note: e-value between nucleotide sequences of genes and the probe sets

**Table S3. Sequence identity among 12 members of UGT72 family in *L. japonicus***

|          | Genbank<br>Accession No. | UGT72AD1 | UGT72AD2 | UGT72AE1 | UGT72AF1 | UGT72AG1 | UGT72AH1 | UGT72B4 | UGT72K1 | UGT72L6 | UGT72V2 | UGT72V3 | UGT72Z2 |
|----------|--------------------------|----------|----------|----------|----------|----------|----------|---------|---------|---------|---------|---------|---------|
| UGT72AD1 | AP009657                 | 100      | 79       | 33       | 32       | 36       | 48       | 43      | 33      | 50      | 33      | 34      | 50      |
| UGT72AD2 | KT895082                 |          | 100      | 35       | 34       | 33       | 46       | 43      | 33      | 49      | 35      | 35      | 46      |
| UGT72AE1 | KP410265                 |          |          | 100      | 50       | 43       | 36       | 42      | 37      | 38      | 41      | 43      | 37      |
| UGT72AF1 | KT895083                 |          |          |          | 100      | 41       | 33       | 41      | 35      | 37      | 39      | 39      | 36      |
| UGT72AG1 | KT895084                 |          |          |          |          | 100      | 36       | 43      | 39      | 39      | 44      | 44      | 37      |
| UGT72AH1 | KT895085                 |          |          |          |          |          | 100      | 46      | 35      | 53      | 37      | 38      | 55      |
| UGT72B4  | AK336772                 |          |          |          |          |          |          | 100     | 36      | 52      | 39      | 39      | 49      |
| UGT72K1  | KP410266                 |          |          |          |          |          |          |         | 100     | 35      | 41      | 41      | 36      |
| UGT72L6  | KT895087                 |          |          |          |          |          |          |         |         | 100     | 39      | 38      | 57      |
| UGT72V2  | AP010407                 |          |          |          |          |          |          |         |         |         | 100     | 84      | 39      |
| UGT72V3  | KT895088                 |          |          |          |          |          |          |         |         |         |         | 100     | 40      |
| UGT72Z2  | KP410264                 |          |          |          |          |          |          |         |         |         |         |         | 100     |

**Table S4. Sequence identity of 12 members of UGT72 family with their top orthologs**

| <b>Gene ID</b> | <b>Genbank Accession No.</b> | <b>Plant Species</b>                       | <b>Genbank Accession No.</b> | <b>Identity</b> |
|----------------|------------------------------|--------------------------------------------|------------------------------|-----------------|
| UGT72AD1       | AP009657                     | <i>Glycine soja</i>                        | KHN34494.1                   | 64%             |
| UGT72AD2       | KT895082                     | <i>Glycine soja</i>                        | KHN34494.1                   | 63%             |
| UGT72AE1       | KP410265                     | <i>Glycine max</i>                         | XP_003524274.1               | 61%             |
| UGT72AF1       | KT895083                     | <i>Vitis vinifera</i>                      | XP_002281768.1               | 52%             |
| UGT72AG1       | KT895084                     | <i>Pueraria montana</i> var. <i>lobata</i> | ADV71360.1                   | 72%             |
| UGT72AH1       | KT895085                     | <i>Medicago truncatula</i>                 | XP_003626718.1               | 68%             |
| UGT72B4        | AK336772                     | <i>Cicer arietinum</i>                     | XP_004494807.1               | 78%             |
| UGT72K1        | KP410266                     | <i>Glycine max</i>                         | XP_003521983.1               | 65%             |
| UGT72L6        | KT895087                     | <i>Phaseolus vulgaris</i>                  | XP_007134372.1               | 73%             |
| UGT72V2        | AP010407                     | <i>Glycine max</i>                         | XP_003527240.1               | 67%             |
| UGT72V3        | KT895088                     | <i>Glycine max</i>                         | XP_003527240.1               | 64%             |
| UGT72Z2        | KP410264                     | <i>Glycine max</i>                         | XP_003532192.1               | 73%             |

**Table S5. Docking statistic and percentage of substrate converted for the 12 recombinant UGT proteins in *L. japonicus***

| Names    | Receptor-ligand<br>(UDPG-Kaempferol) |        | Percentage of substrate converted (%) |    |    |    |    |     |     |    |     |     |    |     |     |
|----------|--------------------------------------|--------|---------------------------------------|----|----|----|----|-----|-----|----|-----|-----|----|-----|-----|
|          | Score                                | Area   | Ka                                    | Qu | My | Ap | Lu | Dai | Gen | Cy | Del | Pel | Ca | Epi | Egc |
| UGT72AD1 | 4088                                 | 452.70 | 6                                     | 80 | 17 | -  | -  | -   | -   | -  | -   | -   | -  | -   | -   |
| UGT72AF1 | 3886                                 | 503.60 | -                                     | -  | -  | 56 | -  | 13  | 34  | -  | -   | -   | -  | -   | -   |
| UGT72AH1 | 4260                                 | 494.50 | 19                                    | 42 | 63 | -  | -  | -   | -   | -  | -   | -   | -  | -   | -   |
| UGT72V3  | 3966                                 | 467.30 | 12                                    | 38 | 15 | -  | 6  | 11  | 17  | -  | -   | -   | -  | -   | -   |
| UGT72Z2  | 4022                                 | 517.30 | 42                                    | 7  | 24 | -  | -  | -   | -   | -  | -   | -   | -  | -   | -   |
| UGT72AD2 | 3976                                 | 445.30 | -                                     | -  | -  | -  | -  | -   | -   | -  | -   | -   | -  | -   | -   |
| UGT72AE1 | 3970                                 | 463.00 | -                                     | -  | -  | -  | -  | -   | -   | -  | -   | -   | -  | -   | -   |
| UGT72AG1 | 3718                                 | 498.40 | -                                     | -  | -  | -  | -  | -   | -   | -  | -   | -   | -  | -   | -   |
| UGT72B4  | 3720                                 | 493.20 | -                                     | -  | -  | -  | -  | -   | -   | -  | -   | -   | -  | -   | -   |
| UGT72K1  | 3958                                 | 484.40 | -                                     | -  | -  | -  | -  | -   | -   | -  | -   | -   | -  | -   | -   |
| UGT72L6  | 4236                                 | 484.60 | -                                     | -  | -  | -  | -  | -   | -   | -  | -   | -   | -  | -   | -   |
| UGT72V2  | 3794                                 | 477.70 | -                                     | -  | -  | -  | -  | -   | -   | -  | -   | -   | -  | -   | -   |

Note: Ka, kaempferol; Qu, quercetin; My, myricetin; Ap, apigenin; Lu, luteolin; Dai, daidzein; Gen, genistein; Cy, cyanidin; Del, delphinidin; Pel, pelargonidin; Ca, catechin; Epi, epicatechin; Egc, epigallocatechin.

Score: Geometric shape complementarity score.

Area: Approximate interface area of the complex.

Percentage of substrate converted represents the means of triplicate enzymatic assays.

-: Not detected.

**Table S6. Primer sequence used in the present study**

| Gene     | Primer name  | Primer sequence (5' to 3')        | Gene Length (bp) | Protein Length (aa) |
|----------|--------------|-----------------------------------|------------------|---------------------|
| UGT72AD1 | UGT72AD1BF   | cgggatccATGGAGACCACAACAACAACCTC   | 1449             | 482                 |
|          | UGT72AD1SR   | gtgtcgacTTAGTTCCTTCCCCTTCAACC     |                  |                     |
|          | UGT72AD1qRTR | TTGCAGGGTCA GAGGTTT GA            | 256              | /                   |
| UGT72AD2 | UGT72AD2XF   | ttttctagaATGGGGTTTTACGATGTGGGT    | 1551             | 516                 |
|          | UGT72AD2HR   | tttaagcttTTAGACCGCTGA CCTTTTCCA   |                  |                     |
| UGT72AE1 | UGT72AE1BF   | cgggatccATGACGGAATCCACGAAACCG     | 1437             | 478                 |
|          | UGT72AE1SR   | gtgtcgacTTATGGGGCTTCATTGCACTGGC   |                  |                     |
| UGT72AF1 | UGT72AF1 EF  | aaagaatccATGGTGTTTCGATGCCAA GAAAC | 1410             | 469                 |
|          | UGT72AF1BR   | aaaggatccCTAATTAATCATACGGACATGA   |                  |                     |
| UGT72AG1 | UGT72AG1BF   | aaaggatccATGTCTCTTGGA CATGGTCGA   | 1527             | 508                 |
|          | UGT72AG1XR   | aaatctagaTCACACTTTTGCCGTTGAAAAC   |                  |                     |
| UGT72AH1 | UGT72AH1XF   | ttttatagaATGGAAGCAAGAACTCACATAG   | 1425             | 474                 |
|          | UGT72AH1HR   | aaaaagcttTTAGTCTTGTGTGATTGTGCC    |                  |                     |
|          | UGT72AH1qRTR | GTGACTTGGA AATTGTCTTG             | 116              | /                   |
| UGT72B4  | UGT72B4CF    | cgggatccATGGAAGAACAATTGAAACTAGTAG | 1446             | 481                 |
|          | UGT72B4SR    | gtgtcgacTTACATGGTTACCGTAACTTTGC   |                  |                     |
| UGT72K1  | UGT72K1EF    | tttgaattcATGGCTGCCTCAA ACTCTCA    | 1464             | 487                 |
|          | UGT72K1BR    | aaaggatccTCATAACGCACCATTTGCCT     |                  |                     |
| UGT72L6  | UGT72L6BF    | cgggatccATGGAGAAGAAAATTACATTGC    | 1422             | 473                 |
|          | UGT72L6SR    | gtgtcgacTACCAATTTTTTCCACTTGAGTA   |                  |                     |

|                   |                    |                                   |      |     |
|-------------------|--------------------|-----------------------------------|------|-----|
| UGT72V2           | UGT72V2BF          | cgggatccATGGAGGACTTGCA CAA GCAC   | 1413 | 470 |
|                   | UGT72V2SR          | gtgtcgacTCATCCTTCGATCATTTTCGCTA   |      |     |
| UGT72V3           | UGT72V3XF          | tttctagaATGGAAGACATGCAGAACCAA     | 1425 | 474 |
|                   | UGT72V3HR          | aaaagcttTCATCCTCCGATAATAATTTTCG   |      |     |
| UGT72Z2           | UGT72Z2BF          | cgggatccATGGCCAAAACAATTACATAGC    | 1470 | 489 |
|                   | UGT72Z2SR          | gtgtcgacCTTTAGTGCCA GGAA GTTTTCAA |      |     |
|                   | UGT72Z2qRTR        | CTGCACTGCA GGGGAAACA              |      |     |
| LJEF1 $\alpha$    | LJEF1 $\alpha$ F   | TGTGAAGGATCTCAA GCGTG             | 103  | /   |
|                   | LJEF1 $\alpha$ R   | GTATGGCAATCAA GGACTGG             |      |     |
| LjUBQ10           | LjUBQ10qRTF        | TTCACCTTGTGCTCCGTCTTC             | 66   | /   |
|                   | LjUBQ10qRTR        | AACAACAGCACACACAGACAATCC          |      |     |
| Lj $\beta$ -actin | Lj $\beta$ -ACTINF | GCATTGTTGGTCGTCTCGT               | 79   | /   |
|                   | Lj $\beta$ -ACTINR | TGTGCCTCATCCCCAACATA              |      |     |
| AtP2Pa            | P2PaF              | TATCGGATGACGATTCTTCGTGCA G        | 173  | /   |
|                   | P2PaR              | GCTTGGTCGACTATCGGAATGAGAG         |      |     |

Note: Lowercase letters indicate linker nucleotides containing restriction sites for cloning.



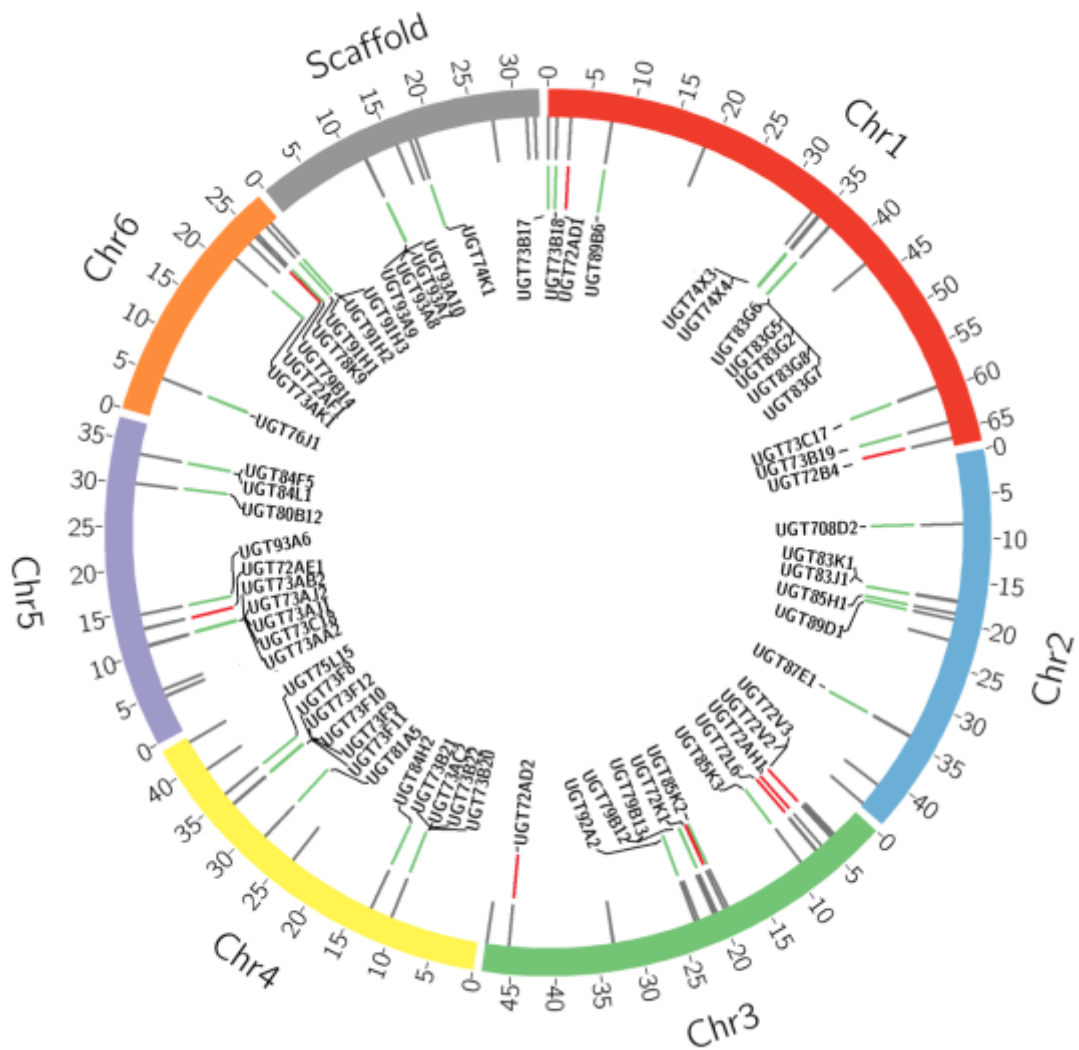

**Figure S1. Genomic distribution of 71 full-length *UTG* genes identified in the *L. japonicus* genome.**

Chromosomal distribution of *UTGs* identified in *L. japonicus*. Six chromosomes and scaffold were indicated in different color. All predicted *UGTs* were indicated by gray sticks in the outer lines and full-length *UGTs* were indicated by green sticks in the inner lines. The *UGTs* from *UGT72* family were indicated in red.



A

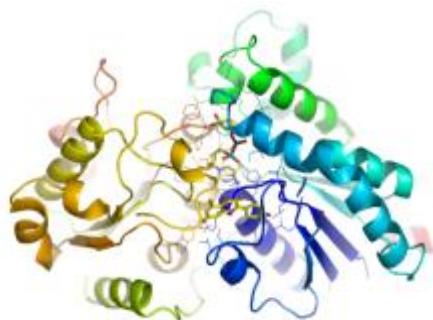

UGT72AD1

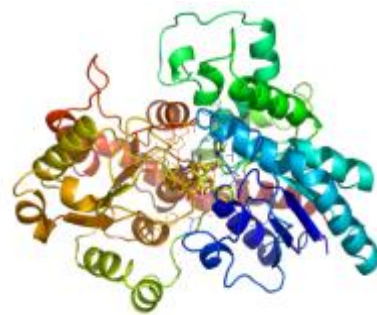

UGT72AD2

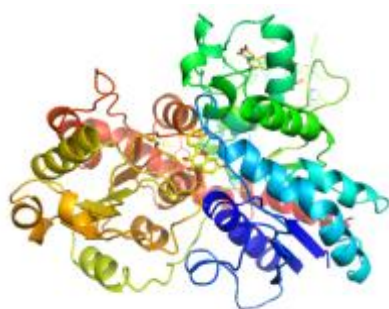

UGT72AE1

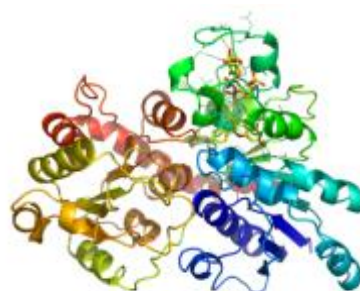

UGT72AF1

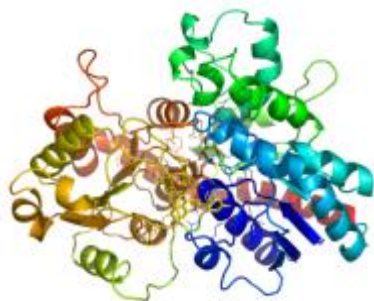

UGT72AG1

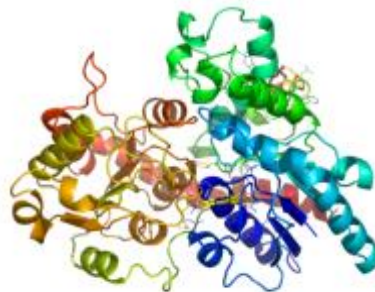

UGT72AH1

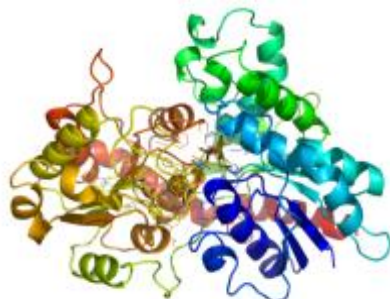

UGT72B4

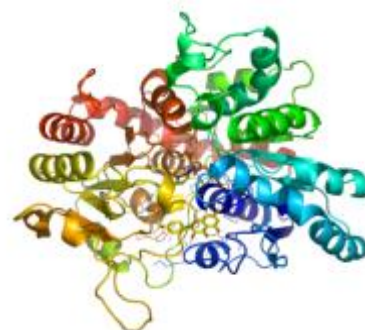

UGT72K1

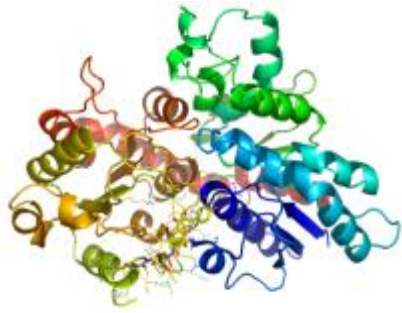

UGT72L6

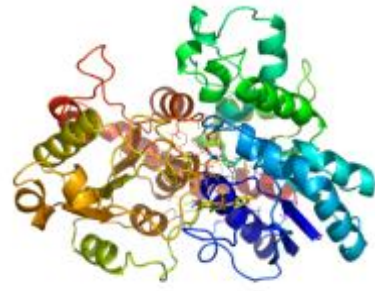

UGT72V2

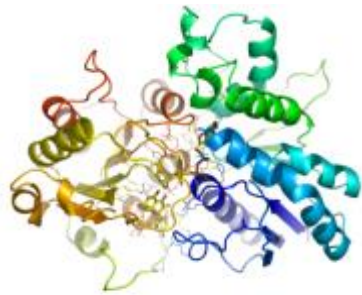

UGT72V3

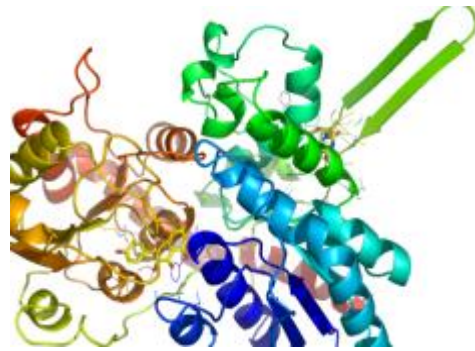

UGT72Z2

**B**

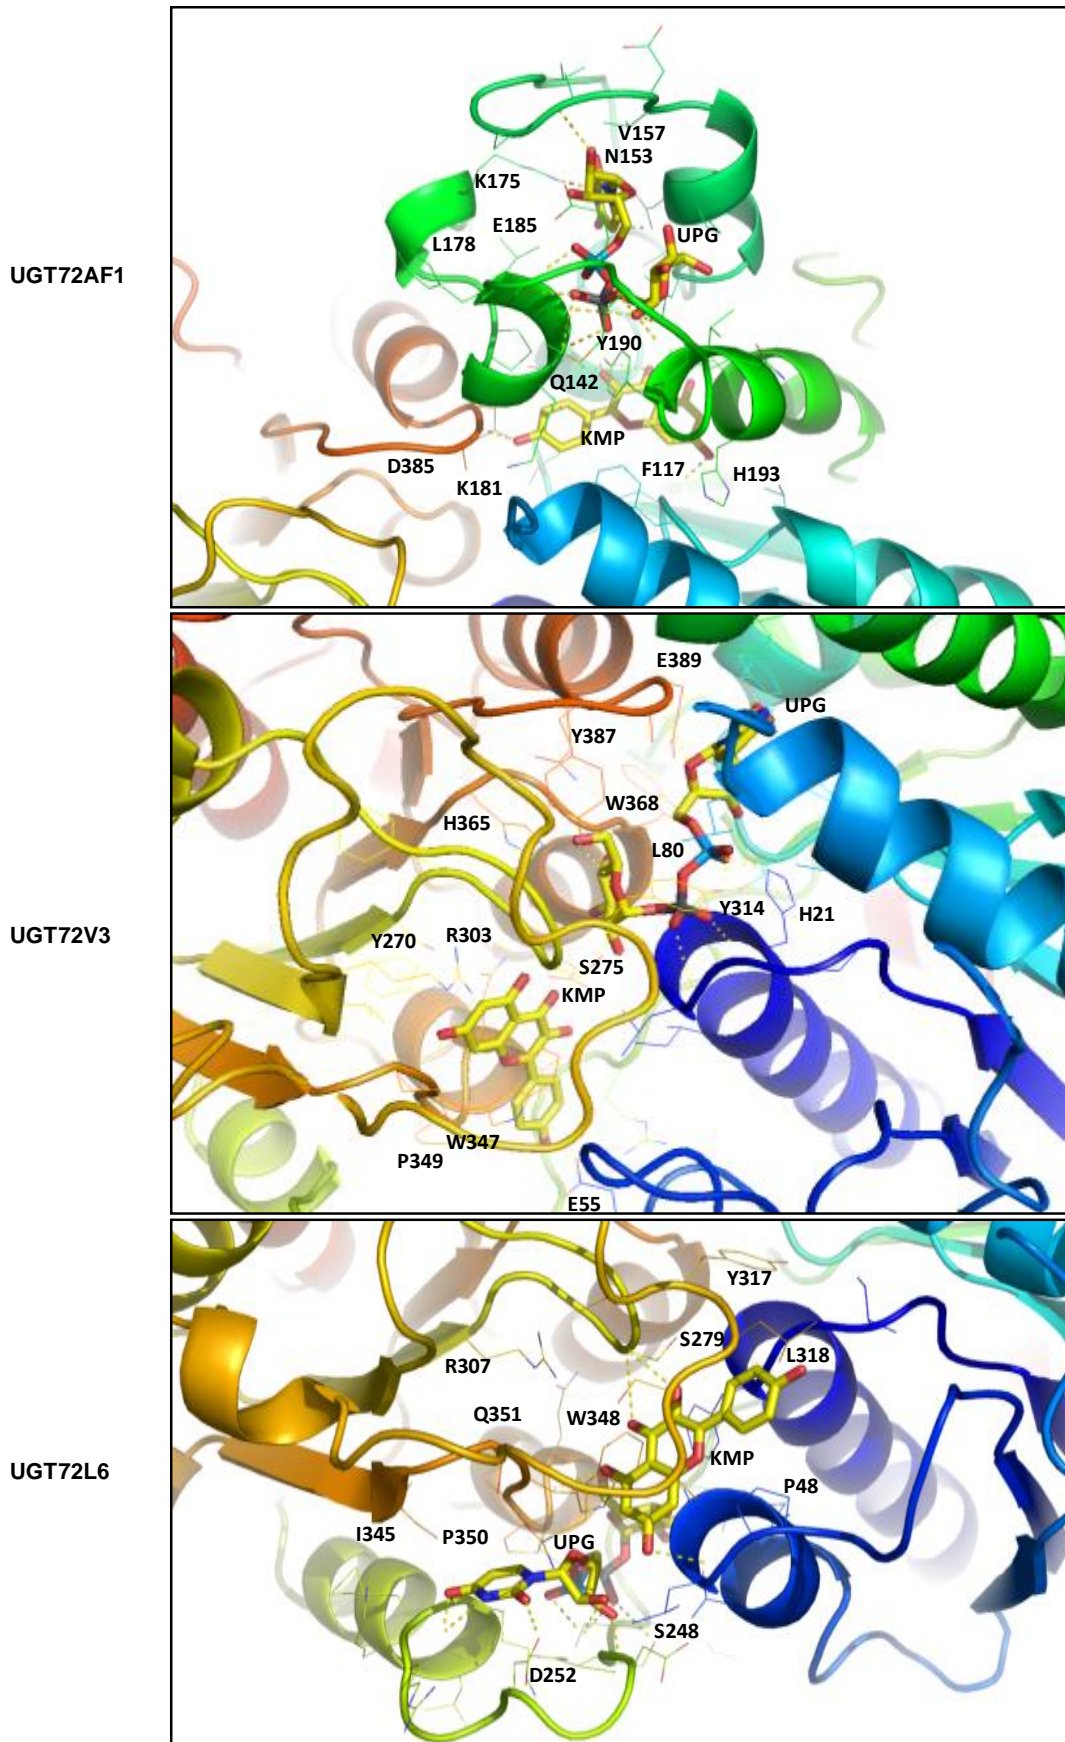

C

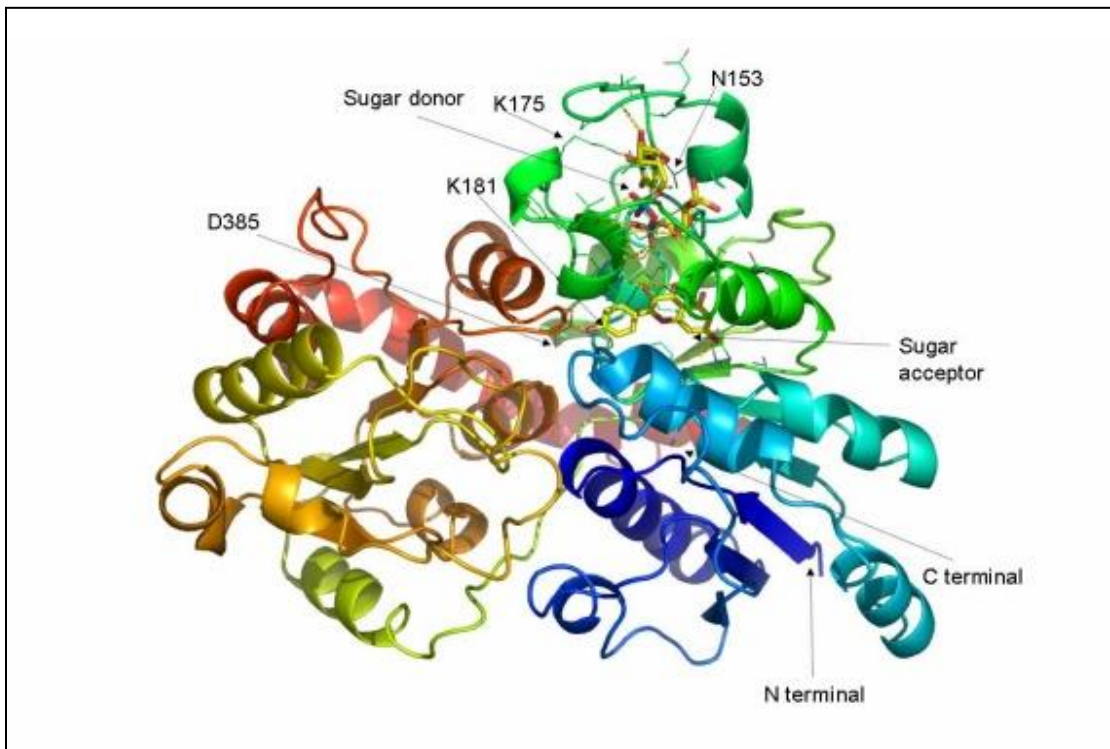

UGT72AD1

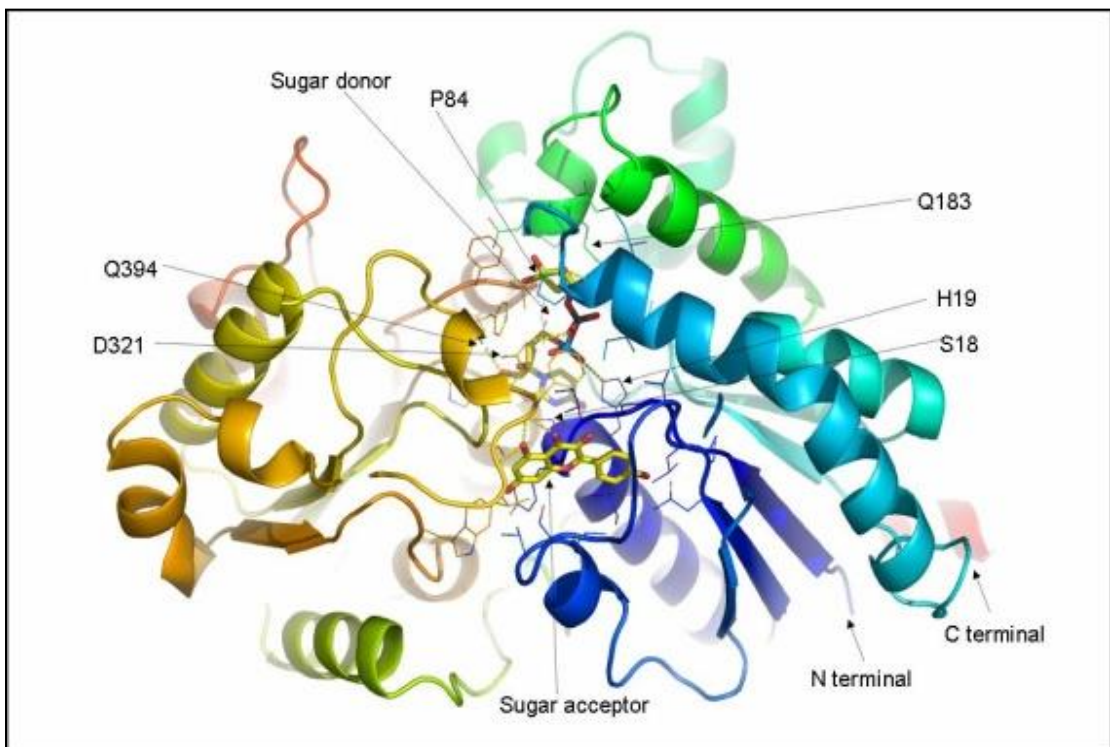

UGT72AF1

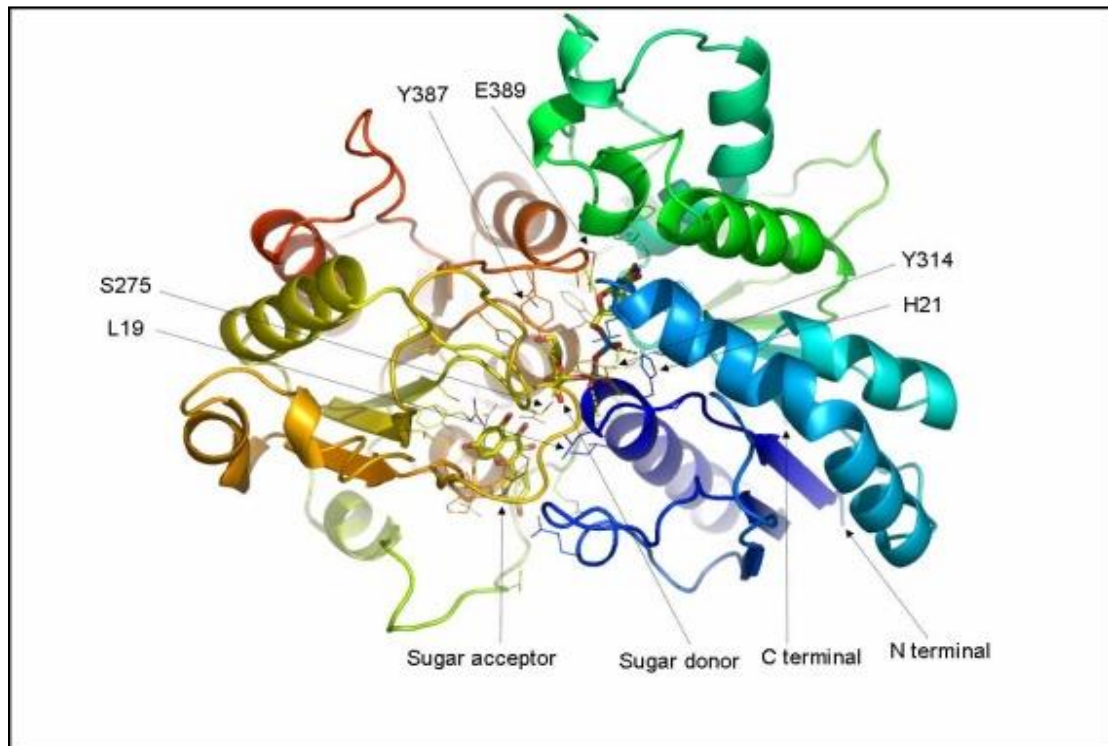

UGT72V3

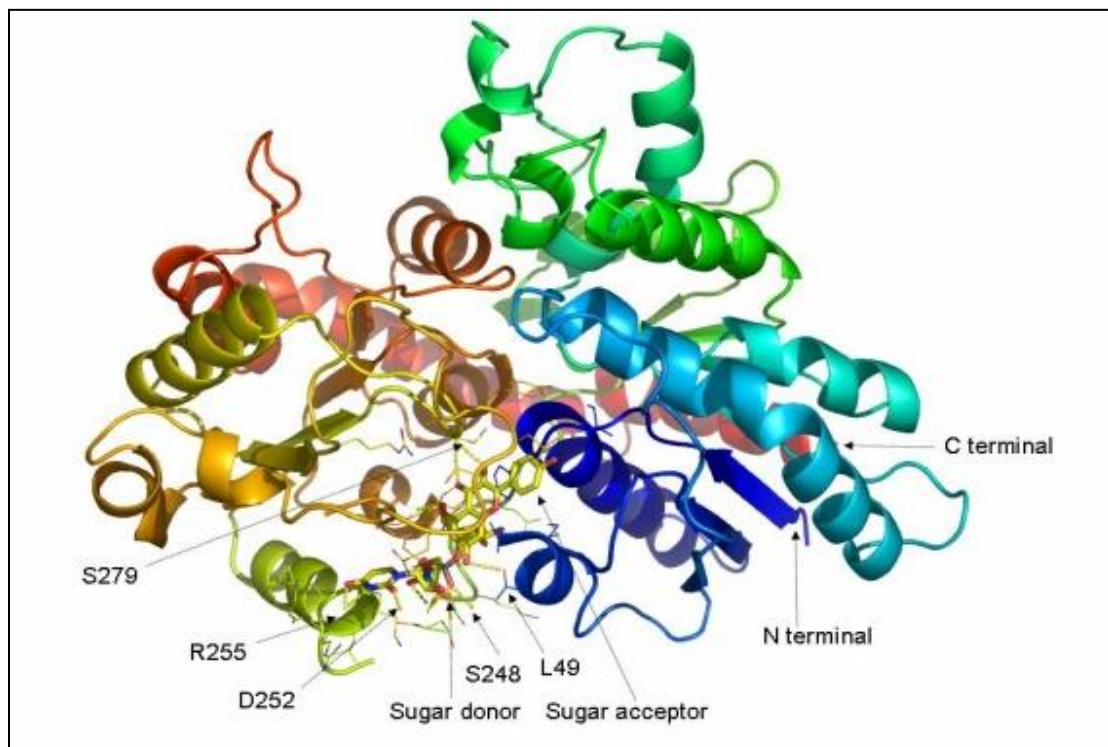

UGT72L6

**Figure S3. Homology docking of twelve members of UGT72 family in *L. japonicus*.**

(A) The structural models docked with UDP-glucose (UPG) and kaempferol for twelve UGTs of UGT72 family.

(B) The structural models of three representative UGTs docked with UDP-glucose and a flavonol (kaemperol). From top to bottom: UGT72AF1, UGT72V3 and UGT72L6.

(C) Highlighted structural models of UGT72AD1, UGT72AF1, UGT72V3 and UGT72AL6 docked with UDP-glucose (UPG) and kaempferol. The amino acids in the form of ligands were labeled.



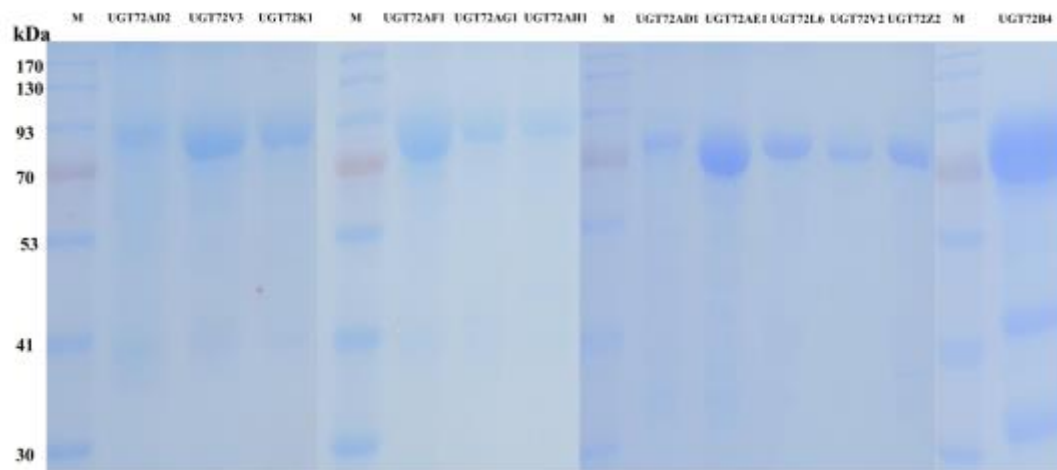

**Figure S4. Twelve purified recombinant UGT proteins on denaturing PAGE.**

M, prestained protein marker with sizes of 170, 130, 93, 70, 53, 41, 30 kDa.

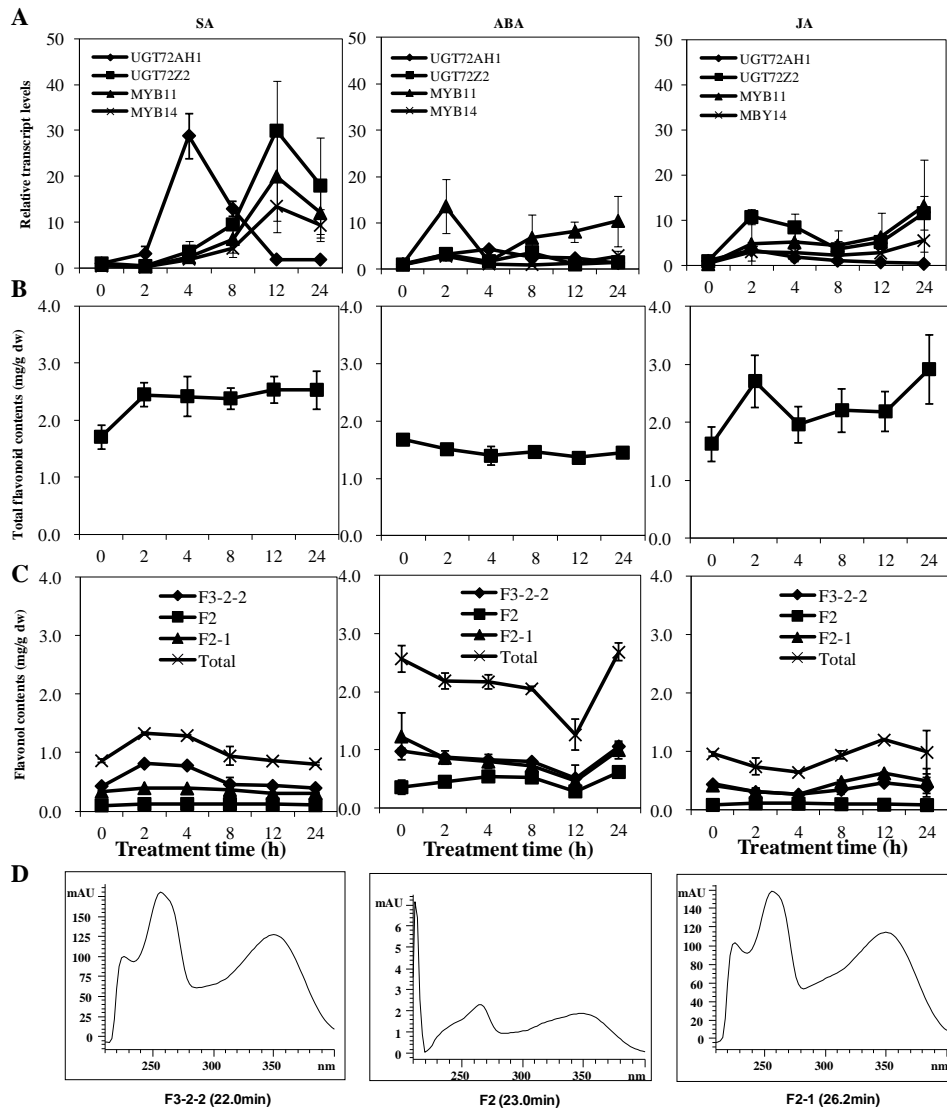

**Figure S5. Effects of SA, ABA and JA treatments on *L. japonicus* hairy roots.**

(A) Relative transcript levels of *UGT72AH1* and *UGT72Z2*, together with two transcription factors *MYB11* and *MYB14* at different time points. Left, SA treatment; Middle, ABA treatment; Right, JA treatment.

(B) The content of total flavonoids in *L. japonicus* hairy roots by SA, ABA and JA treatments.

(C) The content of individual flavonol in *L. japonicus* hairy roots by SA, ABA and JA treatments.

Values represent the means and standard deviations of triplicate treatments.

(D) UV spectrum of flavonol glucosides F3-2-2, F2 and F2-1.

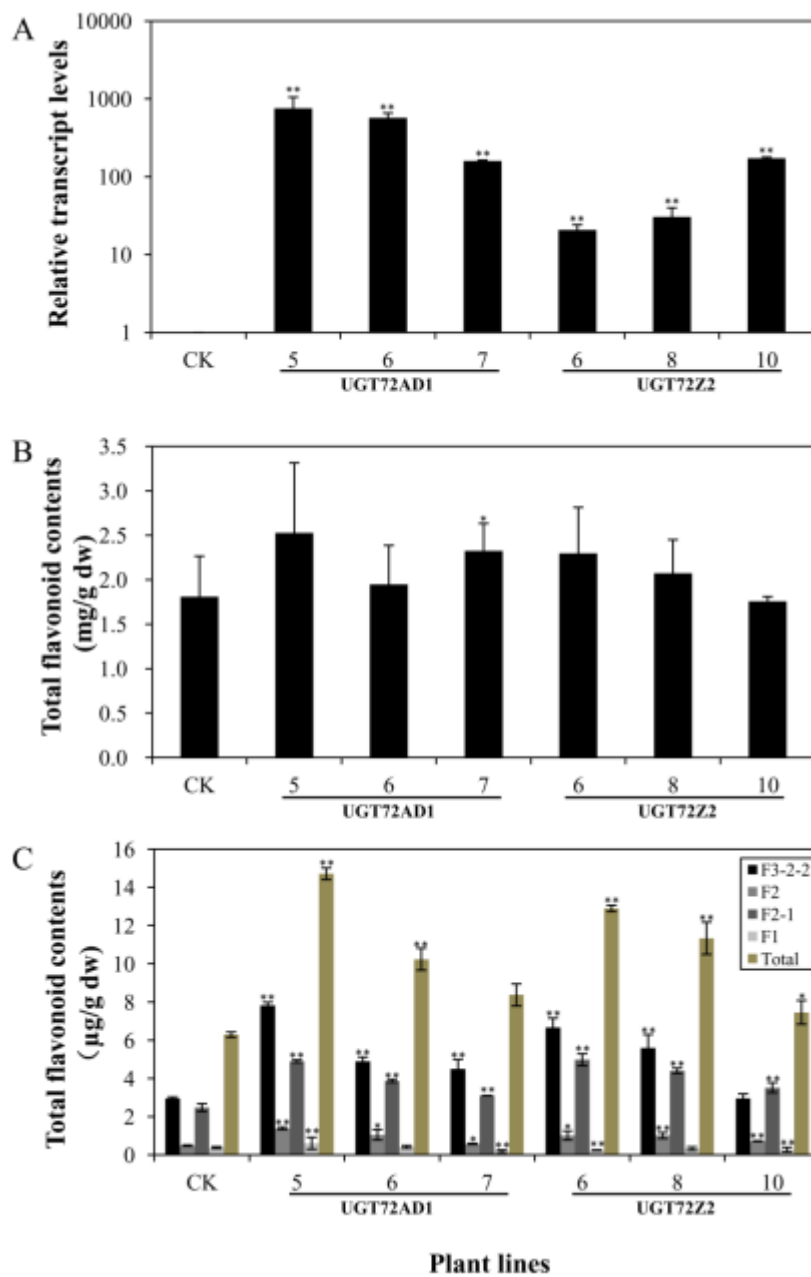

**Figure S6. Over-expression of *UGT72AD1* and *UGT72Z2* genes in hairy roots of *L. japonicus*.**

**(A)** Relative transcript levels of *UGT72AD1* and *UGT72Z2* genes in hairy roots detected by qRT-PCR analysis.

**(B)** Total flavonoid contents in *L. japonicus* hairy root lines over-expressing *UGT72AD1* and *UGT72Z2* genes.

**(C)** Flavonol contents in *L. japonicus* hairy root lines over-expressing *UGT72AD1* and *UGT72Z2* genes.

Values represent the means and standard deviations of triplicate analytical replicates from independent transgenic lines and control. The data were statistically evaluated using Student's *t* test (\*\*P<0.01,\* P<0.05).

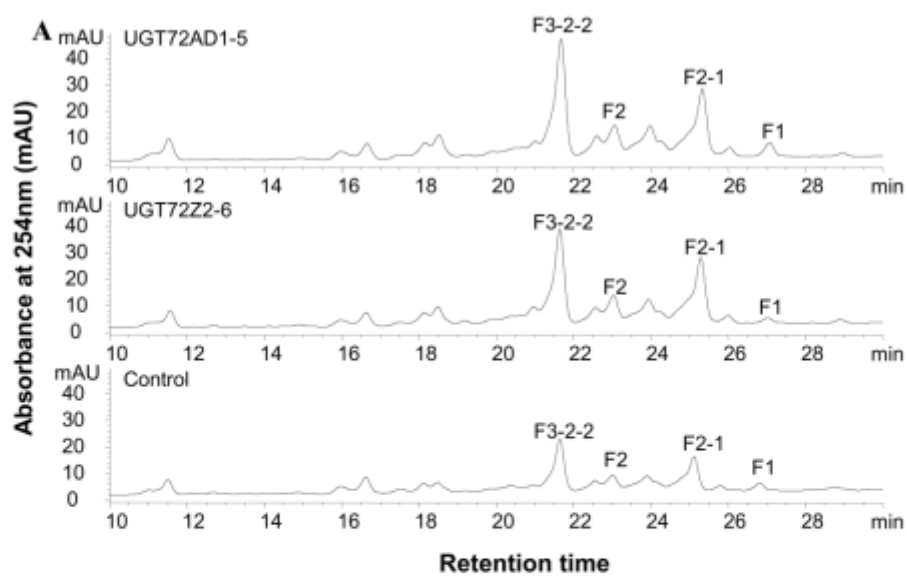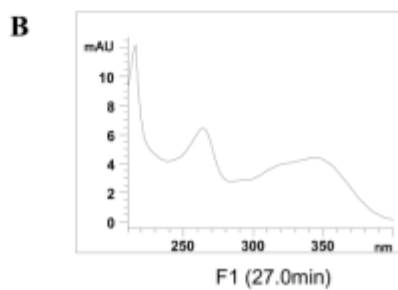

**Figure S7. Representative HPLC chromatograms of *UGT72AD1* and *UGT72Z2* over- expressing lines in hairy roots of *L. japonicus*.**

(A) HPLC chromatograms were obtained from methanolic extracts of transgenic hairy root lines.

(B) UV spectrum of flavonol glucoside F1.

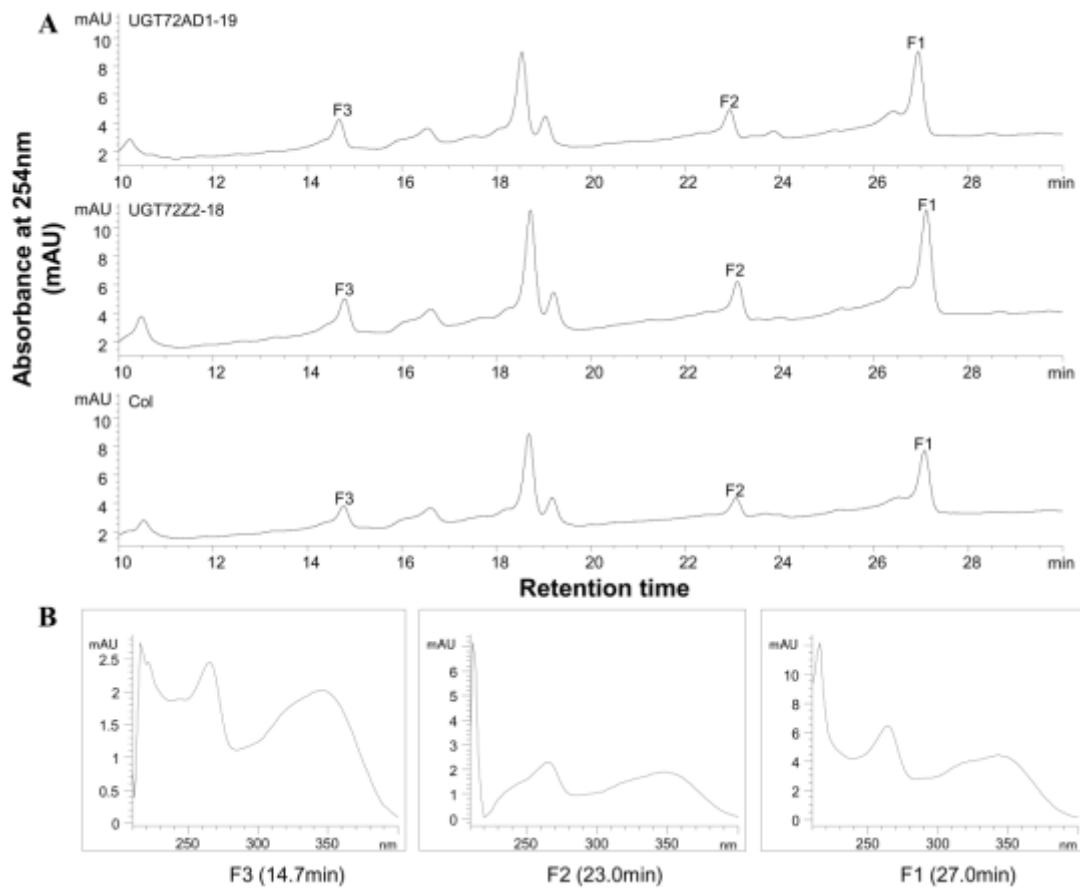

**Figure S8. Representative HPLC chromatograms of *UGT72AD1* and *UGT72Z2* over-expressing lines in seedlings of *A. thaliana*.**

(A) The HPLC chromatograms were obtained from methanolic extracts of transgenic *A. thaliana* seedlings of lines UGT72AD1-19 and UGT72Z2-18 together with wild type Col as control.

(B) UV spectrum of flavonoid compounds F3, F2 and F1.

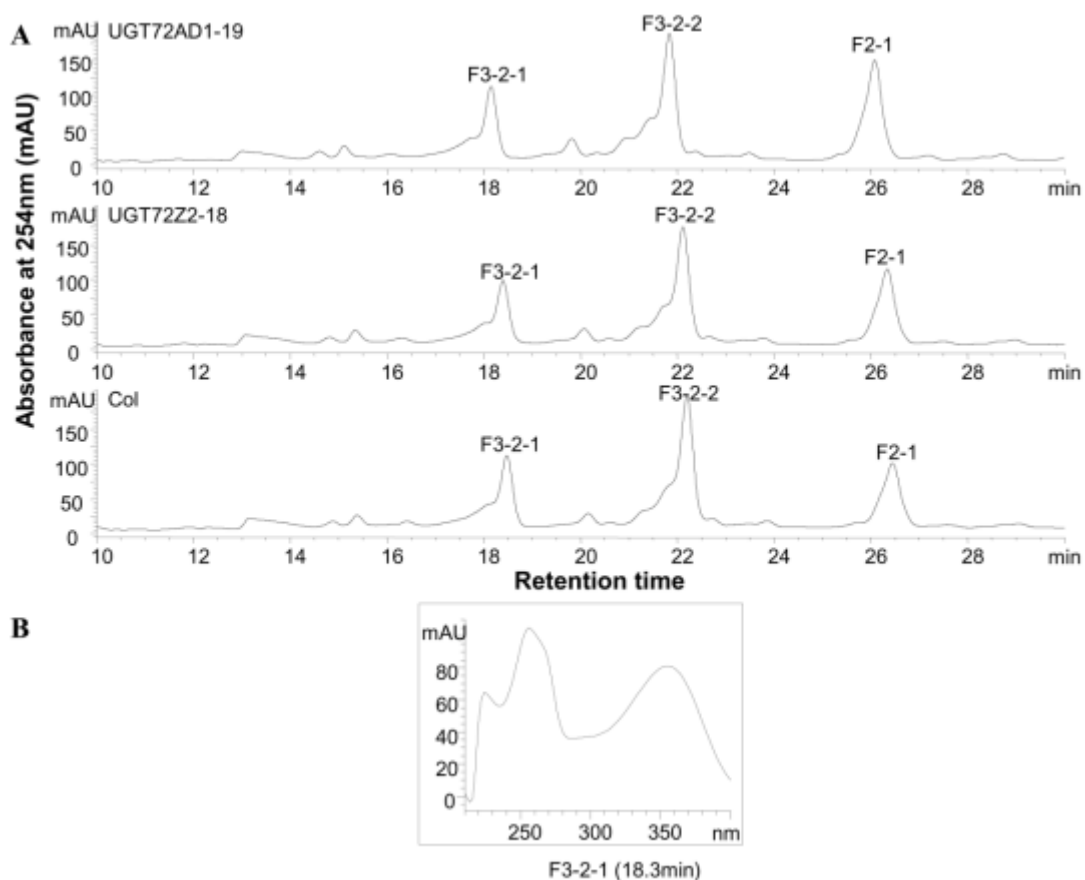

**Figure S9. Representative HPLC chromatograms of *UGT72AD1* and *UGT72Z2* over-expression lines in seeds of *A. thaliana*.**

(A) The HPLC chromatograms were obtained from methanolic extracts of transgenic *A. thaliana* seeds of lines UGT72AD1-19 and UGT72Z2-18 together with wild type Col as control.

(B) UV spectrum of flavonoid compounds F3-2-1.

**Accession numbers:**

Gene names, plant species and GenBank accession numbers are as follows: AmF7GAT, BAG31945.1 (*Antirrhinum majus*); AmF7GlcT, BAG31950.1 (*Antirrhinum majus*); At3AraT, NP\_197205.1 (*A. thaliana*); AtF3G7GT, NP\_181217.1 (*A. thaliana*); AtF3GlcT, NP\_197297.1 (*A. thaliana*); AtF3RhaT, NP\_564357.1 (*A. thaliana*); AtF5GlcT, NP\_193146.1 (*A. thaliana*); AtF7GlcT, NP\_567955.1 (*A. thaliana*);

AtF7RhaT, NP\_563756.1 (*A. thaliana*); Cs3GlcT, AAS00612 (*Citrus sinensis*); Dc3GT1, BAD52003.1 (*Dianthus caryophyllus*); FaGT6, Q2V6K0.1 (*Fragaria vesca* subsp. *vesca*); GeIF7GlcT, BAC78438.1 (*Glycyrrhiza echinata*); Gh5GT, BAA36423 (*Glandularia* × *hybrida*); GhA5GlcT, Q9ZR25.1 (*Glandularia* × *hybrida*); GmIF7GlcT, NP\_001235161.1 (*G. max*); GT04F14, ADV71364.1 (*P. montana* var. *lobata*); GT12D15, ADV71367.1 (*P. montana* var. *lobata*); Hg3GT, P14726 (*Hordeum vulgare*); Ih3GT, BAD83701.1 (*Iris* × *hollandica*); Ih5GT, BAD06874 (*Iris* × *hollandica*); Lb7GlcT, BAG80536.1 (*Lycium barbarum*); Mt7GT, AAW56091 (*M. truncatula*); Per5GT, BAA36421 (*Perilla frutescens* var. *crispa*); PfA5GlcT, Q9ZR27.1 (*Perilla frutescens*); PhA5GlcT, BAA89009.1 (*Petunia* × *hybrida*); RhA53GlcT, Q4R1I9.1 (*Rosa hybrid* cultivar); SbF7GlcT, BAA83484.1 (*Scutellaria baicalensis*); SIF7GAT, BAG31946.1 (*Scutellaria laeteviolacea* var. *yakusimensis*); ThA5GlcT, BAC54093 (*Torenia hybrid*); UGT72AD1, AP009657 (*L. japonicus*); UGT72AD2, KT895082 (*L. japonicus*); UGT72AE1, KP410265 (*L. japonicus*); UGT72AF1, KT895083 (*L. japonicus*); UGT72AG1, KT895084 (*L. japonicus*); UGT72AH1, KT895085 (*L. japonicus*); UGT72B3, AEE27284.1 (*A. thaliana*); UGT72B4, AK336772 (*L. japonicus*); UGT72B18, AGU14071.1 (*C. arietinum*); UGT72K1, KT895087 (*L. japonicus*); UGT72L1, CC38470.1 (*M. truncatula*); UGT72L6, KP410266 (*L. japonicus*); UGT72V2, AP010407 (*L. japonicus*); UGT72V3, KT895088 (*L. japonicus*); UGT72Z2, KP410264 (*L. japonicus*); UGT78K1, ADC96620 (*G. max*); VmF3GalT, BAA36972.1 (*Vigna mungo*); VvF3GlcT, P51094.2 (*V. vinifera*); ZmF3GT, P16165.1 (*Z. mays*).
